# Supplementary material
Source: ML conference proceedings conference paper supplement (https://openreview.net/forum?id=ZRYFftR4xn)
Supplement: supplementary_material [file attachment]

## Sheet: Sheet1
1.27103	5.02984	4.88843	7.31118	26.3955	10.3313	6.99237	6.06492
2.98539	4.459	4.83887	8.02263	5.32913	5.26421	9.38068	13.9286
1.89415	4.8563	7.55158	7.48655	6.08764	13.1152	6.36098	9.48399
1.26951	5.10761	5.46617	6.04979	6.28146	8.98181	5.70964	7.10052
2.51768	3.62241	7.45551	14.4182	7.72806	4.72916	5.16586	8.93962
1.27161	4.37953	4.77445	6.09742	20.4188	9.78677	4.98412	4.99825
1.31135	4.26692	4.62388	10.145	10.8663	5.48075	5.16824	6.00358
1.26587	7.51669	8.49607	6.76198	9.95852	8.80122	8.75274	5.44415
1.72733	5.51434	5.79564	7.672	12.6539	5.73956	5.22501	10.0694
3.06129	6.1685	6.47279	4.22274	9.77707	8.46957	6.36109	5.13301
2.2974	9.0772	4.10751	4.79307	5.07412	5.51486	15.9557	5.32336
1.52543	4.83921	5.90271	7.46985	5.59692	5.7103	5.47533	8.11233
1.46091	14.4725	8.02182	4.75157	6.54644	5.00371	14.954	4.78165
6.12302	10.7431	8.76926	5.24577	6.28162	4.8972	4.47444	7.4029
0.617301	7.1131	19.8151	5.26314	8.15471	7.92088	7.70437	5.35923
2.702	6.19981	4.96736	10.1548	8.32006	9.99505	10.7108	4.88221
1.18251	5.72782	7.20857	8.62339	5.64717	4.66279	9.86775	7.71882
1.33448	8.03766	7.38346	14.4662	16.7548	4.62404	9.3913	5.36786
1.01412	5.74755	16.8249	6.92492	7.88854	4.8664	6.70005	7.97206
0.949223	4.78252	5.86256	4.77223	5.3294	6.28195	5.26708	5.68072
1.59826	4.84032	8.27809	4.86512	8.36705	4.77003	5.17379	4.84202
1.85462	4.46375	11.284	5.66569	5.01398	6.12583	4.59624	8.23787
2.92195	4.01967	6.67986	7.57892	9.77002	6.67179	7.00817	8.97483
2.71844	5.23769	6.48561	5.2455	6.53677	7.36715	8.67928	5.82621
2.00672	3.33576	4.82893	16.3753	4.40326	6.91127	6.01104	6.81253
1.7283	8.96974	7.38989	8.04709	9.66726	4.42767	5.2278	6.72918
1.07095	9.63383	5.03994	6.71432	6.31091	6.47061	4.41232	6.93873
1.60907	6.21247	7.59705	7.96881	10.5836	4.58827	6.24677	6.13346
1.76334	3.90295	5.13908	8.53113	10.3349	6.40221	6.89377	4.11702
2.2372	13.7118	5.43012	6.27299	7.51933	6.46912	7.94771	9.2363
0.866974	3.74959	5.19838	9.17505	8.84558	7.03564	5.51859	5.91483
1.40102	5.10623	6.1907	4.73092	6.23407	5.70736	5.30561	5.6821
1.33972	9.68217	5.41933	4.41198	7.44517	6.00874	5.91491	4.61176
1.17284	3.7623	5.70262	6.02348	6.33828	9.08265	8.73958	6.54536
1.66219	5.72484	7.98504	5.69891	4.4372	6.16077	6.50325	5.39416
2.16659	6.73714	7.14925	7.93537	6.47858	5.76576	6.52629	7.1829
1.68863	5.46651	5.18952	11.4635	5.52914	5.83802	6.50116	10.3995
1.85735	5.13127	12.8222	6.8828	5.53095	6.42911	5.51862	16.6982
1.2943	3.90803	6.81752	7.41716	5.37879	6.30654	6.3153	9.59902
2.37192	7.14508	4.43621	6.04511	8.06715	4.97332	6.92857	5.55505
1.58228	3.97565	4.61042	4.92849	5.79459	6.44797	4.60684	6.56949
3.06434	9.47219	5.36686	5.64478	6.35384	5.77889	4.7944	5.53667
1.76265	5.94653	4.8836	6.46419	5.80386	5.31987	6.621	6.1954
3.91444	4.83066	8.0089	15.4424	4.64261	8.83149	8.19914	6.33879
1.48644	4.74117	4.62954	6.0123	6.08841	7.74118	5.5621	10.3526
2.23692	6.15187	6.21792	4.8465	5.36331	7.64641	6.53906	8.31988
2.12154	4.60471	5.1013	7.0042	6.58508	6.65917	8.09684	7.39951
2.60154	8.08013	7.12807	4.57388	6.73463	8.1289	6.7122	14.3232
1.26003	3.99673	4.8246	5.42756	8.04527	4.96638	5.64009	10.2437
1.3289	4.82574	9.41306	5.62531	6.95147	5.45141	8.36051	6.33699
1.80599	3.49451	7.10561	7.56071	6.41013	5.22951	6.32029	5.39918
0.970039	4.37098	6.12198	5.22183	7.26225	7.73774	5.66177	8.03776
1.52378	4.26658	8.40881	5.18247	8.35213	6.13938	5.67962	9.59153
1.34008	8.98217	5.39883	7.99423	6.31429	8.18547	5.75695	6.27436
0.783973	6.11905	8.32449	5.63753	4.62908	14.2224	5.90732	9.5241
3.76892	4.54586	8.1069	6.06094	5.18367	6.62764	4.39077	7.24905
1.36403	9.70218	5.65317	7.79302	7.11226	6.88512	4.76652	17.7517
1.17258	4.01144	12.8711	4.69902	6.16598	5.05196	6.6675	5.48739
0.569274	7.26474	12.2941	5.62741	8.69324	8.7885	5.95727	8.41795
2.52701	5.61014	5.32479	5.36594	7.57732	12.2311	6.33889	5.92771
1.17108	4.89342	6.91356	6.13052	5.63816	5.93285	6.22571	10.0365
2.18746	5.47595	6.27259	16.5437	17.2059	6.8984	5.6402	6.27111
3.17171	6.85225	6.38124	5.71581	6.30923	9.09662	10.2539	5.13829
0.781	7.19717	4.86297	6.82586	9.06114	5.77625	14.9896	9.08574
1.50613	15.0171	6.82989	5.20586	7.02003	5.70096	6.0092	7.1974
1.14592	4.18707	6.82661	5.47979	11.1546	6.01982	7.85449	7.47878
2.48716	3.0006	5.27863	7.5198	5.94132	8.30652	5.32483	4.80378
63.422	10.3663	11.3197	6.40949	11.7057	10.5105	4.96735	8.11738
2.40264	4.52572	4.80838	4.68207	4.68423	7.73571	9.26554	9.30925
2.13923	5.36086	6.33006	8.6031	8.1992	4.63288	4.77947	16.2504
1.23317	8.94626	5.53686	6.78921	7.76802	7.82769	5.86408	4.49242
2.13211	4.54602	6.22439	8.22016	6.13119	6.08663	8.04035	8.12102
1.60646	3.95633	7.57264	4.40651	6.18168	5.20762	4.59635	5.28475
1.92222	9.31901	5.90114	6.12664	5.60685	6.76785	7.34036	8.26222
1.32157	5.36658	24.2765	4.88135	4.51932	5.17214	6.09221	4.45459
1.04928	8.57418	5.56244	7.91741	5.10617	5.80666	10.2845	7.07008
1.14736	4.50329	8.73182	4.87389	12.4793	6.91614	13.2885	6.75645
1.03897	4.88872	9.60798	5.23097	5.94316	11.5297	6.76799	7.19987
1.14304	7.36807	5.98088	7.32165	5.41414	8.39489	5.78449	8.58843
2.45945	6.12717	6.53941	4.92887	5.57431	5.00192	5.76236	6.15895
1.40981	6.71822	4.93526	5.28375	43.269	4.62837	12.3246	5.30581
7.46505	5.3208	5.92748	4.39718	13.5973	11.0765	7.05984	8.60966
2.77056	7.69535	7.16946	4.5227	8.47317	11.4508	5.67827	4.7058
2.2913	3.5638	8.11991	5.90986	5.12684	5.28055	9.53829	6.73506
1.96231	7.11245	7.95116	8.27492	5.4828	5.44965	6.23541	5.08932
1.72228	4.99759	5.1973	4.87585	7.64347	4.63588	6.13333	6.32638
1.55752	5.61585	7.82422	8.77107	4.83441	5.1473	6.78242	7.09505
9.00798	7.38899	6.30348	7.78344	5.63633	5.96133	5.17436	6.17655
2.46999	4.45396	4.86413	7.63659	4.33816	7.07725	5.40346	4.7625
0.824665	4.25098	5.93264	10.4908	6.51879	5.62017	4.40576	4.6441
18.4505	7.28494	9.02198	11.4546	5.60472	5.85804	8.15144	8.96322
1.03333	3.93794	4.9548	5.81746	5.65083	8.5596	6.11632	6.02395
1.49097	5.60559	4.47571	8.6973	8.76902	4.74399	7.29719	5.01009
1.43091	11.3636	5.08415	5.69372	14.0935	7.07835	6.95623	9.71928
1.7127	5.117	6.7295	11.0564	7.51847	7.99892	4.15167	13.0307
1.88093	8.48138	7.33263	9.38278	8.82241	5.6698	5.05055	11.1789
1.90135	6.88966	5.56259	5.49492	14.2327	5.44196	5.21502	8.85864
1.18733	4.36857	6.91404	5.09491	6.66507	6.59584	4.89624	4.63047
2.42665	6.37484	6.59556	11.5475	5.41318	5.0549	8.19975	5.90066
1.64344	5.37169	5.78679	8.45223	7.54533	6.07853	5.86251	9.94905
2.13945	8.10331	5.4046	4.76253	4.60167	5.05768	5.74472	12.0707
2.30154	5.78931	5.51058	7.35388	9.02145	5.10492	5.16212	5.03363
1.38401	6.45777	7.21994	5.38257	9.86733	6.76543	6.58934	11.9777
4.29459	12.5179	5.64204	5.43953	5.8418	5.14295	5.49291	7.0255
0.862795	3.84288	16.5966	6.15155	4.32272	6.58924	9.92834	7.4823
1.61483	7.3285	6.21191	9.02984	8.21136	8.62634	5.6511	4.97728
1.77227	5.51365	4.46153	5.02317	7.05909	7.30562	5.48161	15.1062
1.09563	5.73887	5.22908	5.22441	4.27733	5.63456	7.37581	4.92216
2.01006	4.42555	4.054	5.56523	8.33406	10.0099	6.30053	6.49187
1.35272	4.51402	15.1592	4.95341	9.78986	7.953	4.77158	7.49313
1.15313	3.60831	6.48155	7.59506	5.47403	18.8557	4.47004	6.94938
2.02726	6.71358	5.99278	5.24777	4.86372	5.54942	5.43602	6.02153
1.44823	7.0923	6.05995	6.56255	4.74259	5.5308	4.91024	5.60639
1.44478	5.95893	6.38449	8.13276	5.88097	13.9236	4.40368	4.9829
1.60117	196.774	13.6832	5.37203	7.23765	4.85179	4.08017	5.20252
14.5345	5.37911	6.06279	9.25699	6.484	4.90049	16.2219	5.401
1.88698	5.03734	5.11704	5.49794	5.68083	5.89191	6.46737	7.97518
1.33844	9.09521	5.16777	6.60748	6.67426	5.55248	5.0451	7.81396
2.21765	5.01057	15.4571	6.65562	5.88012	4.82894	6.24089	11.6682
1.45684	4.99681	4.98515	5.83594	19.7956	10.0464	5.55376	6.60747
2.10371	6.16597	5.36439	6.49272	4.97836	4.61227	10.5819	6.83493
1.58326	5.16163	5.0695	7.60246	7.11783	4.51343	5.27831	5.16016
2.59847	8.18285	5.55299	4.93959	7.29117	8.0083	6.9782	7.48693
0.94909	4.19143	3.68522	5.13491	6.04667	5.48368	5.757	7.27798
1.68002	5.6909	5.20297	6.67769	8.28123	6.5163	5.08886	5.5309
0.80276	6.56106	5.47606	5.97856	9.88275	6.21291	8.11792	5.02427
1.56004	8.45693	5.12525	4.69235	4.82887	6.5736	7.83753	10.5481
0.995095	10.133	6.2609	6.42466	4.51624	10.6082	5.13391	5.65993
2.84737	69.0337	4.88648	9.44155	6.60668	5.04255	6.57436	6.25491
2.38002	5.75919	12.0537	5.93214	4.51145	4.35292	9.23243	5.03931
1.33249	4.36738	11.5244	10.1199	15.4833	6.10035	5.83352	7.04753
2.93975	3.79956	6.7407	6.52279	5.52603	5.50204	4.40105	5.14264
3.90602	36.5574	13.963	7.55202	8.10482	6.11077	5.02562	6.41858
1.19145	6.23384	6.85021	7.64186	5.853	7.23047	10.6339	31.1081
2.21637	4.92973	8.22894	6.91432	5.66554	6.30219	6.32026	7.43497
1.7618	6.54613	7.04643	5.47346	4.8692	10.103	10.65	9.10396
1.3641	5.28198	6.0033	8.0179	6.61019	16.9574	23.0096	8.98085
1.55363	5.56592	6.76078	5.21834	6.32193	6.8386	9.3445	4.78018
1.58952	4.64989	4.87577	5.41798	9.27978	9.60402	5.13067	8.24216
1.46882	8.08322	4.58488	5.54548	7.48434	11.2179	6.10576	8.93429
1.37906	5.28179	7.87552	4.55908	4.90684	5.14955	5.07656	6.06857
2.79757	4.47456	6.13119	5.87062	6.00868	7.88145	5.75964	5.33669
1.68194	4.91345	5.66585	5.4389	7.53141	8.4285	8.15403	7.68842
2.01842	5.16738	5.7648	9.82255	5.98025	5.93627	6.04677	6.18722
1.89953	5.0512	3.85501	5.18777	5.48507	5.20433	7.96056	8.28554
2.86133	115.98	4.997	4.54952	4.56125	5.34591	5.91438	7.60261
0.91594	12.229	7.86085	5.10679	12.5002	6.12805	8.44746	5.30698
6.54148	6.82615	4.78858	7.92218	13.6358	8.85851	10.1183	7.08711
2.79196	5.54072	8.50318	9.6097	6.5218	5.07919	10.2382	7.81219
3.01906	4.61037	5.18493	6.22327	5.82973	7.53572	6.58538	9.12052
1.80272	5.1461	4.99588	7.3564	8.19126	6.32534	52.7603	8.45578
1.45458	51.6163	9.70651	5.21863	9.4362	12.0716	5.51021	5.95698
1.98414	4.09744	8.79115	4.85684	18.3974	4.86605	7.81333	14.5641
1.84187	6.29656	6.90264	9.11252	6.49577	5.89163	7.73479	5.11473
3.81282	8.80589	8.65705	6.60794	5.05561	6.50142	4.05841	6.7801
1.30131	5.7643	6.14383	6.08618	7.98391	6.78543	7.89954	5.24767
3.05118	10.9628	6.51955	6.57134	8.68423	4.88816	9.01357	7.56177
1.54397	6.45106	10.4494	5.74672	7.0431	5.71198	5.35154	5.74367
2.70095	6.28653	7.94179	4.78566	6.27313	9.06374	11.5689	6.56029
2.09518	14.2458	11.5844	8.37723	6.99149	6.58816	10.5473	9.55449
1.99052	3.76831	4.86192	6.77635	8.66577	4.99733	6.37855	14.0895
2.24717	8.26601	7.27756	4.67706	8.01234	5.59557	8.73025	9.13089
1.50072	8.12637	13.0058	5.22923	10.7445	8.99281	23.7929	7.83648
2.61106	4.43215	5.64048	5.51999	5.08563	5.67561	4.65434	7.99785
2.05313	3.35544	5.50574	4.96909	9.63696	8.77254	6.61872	6.60122
1.07973	7.3061	9.64277	6.75224	4.8296	4.1247	6.35228	7.56326
1.78485	6.62555	4.92241	5.23776	5.2053	4.58906	9.25921	5.26495
1.75673	9.17015	7.2058	5.60868	4.3064	6.23409	5.36646	5.0873
24.4842	9.3427	11.8307	7.36341	6.10821	7.45864	5.73785	6.12986
1.9098	3.57133	9.4405	8.84153	10.6178	13.6288	4.77173	6.83781
1.63578	4.41986	5.86847	6.0584	4.72172	6.38449	14.3409	6.00098
1.05106	7.29357	5.55196	7.85737	5.13438	5.9961	7.0643	6.01659
1.58923	3.24605	5.26972	5.66094	4.96126	6.7989	8.18482	6.64996
1.08485	8.37951	6.67798	5.39254	5.73728	7.3732	4.84099	5.44224
8.56795	10.4248	3.84411	7.66325	5.16687	5.79849	7.42114	9.46201
8.4726	3.35085	7.82673	4.36617	6.17884	6.58085	5.70358	7.68
1.20245	3.7367	5.26983	9.09493	4.41838	4.97161	6.72215	8.50055
0.979702	16.3151	4.87854	5.96917	7.49677	9.13104	5.72491	9.33135
2.09745	116.455	4.80244	4.98664	5.34924	6.78328	6.30858	9.86639
2.65708	6.3438	14.6645	4.84178	7.65713	6.62356	20.7106	5.53579
1.6547	11.1811	6.55555	6.57586	4.87164	5.01798	5.91825	6.20658
1.61229	5.65057	4.86814	5.84164	9.40257	6.30688	5.63831	6.47911
1.33278	4.18	4.63131	5.93272	6.50259	6.53681	6.13816	6.83944
1.21954	4.96517	5.06432	12.0968	9.4855	5.22369	6.50002	6.13247
1.46683	4.29572	4.07399	9.01762	6.90826	7.85344	7.33028	7.54108
1.79707	5.53387	7.3379	6.25548	12.3621	5.52086	9.30411	8.08653
2.35089	5.92166	8.28843	6.75438	5.1637	5.39771	5.88642	9.7815
1.45374	5.52889	7.34357	5.89423	5.96249	7.32586	6.40151	4.58941
1.94457	3.43025	4.28253	6.73326	6.06714	7.52251	5.74563	11.7219
1.16633	6.18365	5.65689	4.41989	5.73802	5.65626	6.7855	6.19494
4.16352	4.89494	6.08598	6.17137	10.792	4.53831	6.76166	4.74509
2.11183	6.87621	5.16754	6.90942	6.91007	7.98642	4.89189	5.64675
2.3175	6.80082	10.6468	5.3391	8.27922	5.89491	7.79235	12.4268
1.54282	4.56066	6.82186	5.61706	6.68439	5.28954	5.97667	21.9532
4.75936	10.7476	8.43767	9.79827	6.32079	8.42841	10.614	7.9994
1.37468	3.8386	6.77578	5.42691	9.06819	9.47627	6.30079	6.84537
2.32444	4.54357	6.57605	7.42895	6.1723	6.52733	4.33744	5.95855
1.9159	3.46514	5.13146	4.83697	6.85523	5.71818	7.30589	5.37435
1.92996	5.31464	4.63161	6.0163	6.25493	7.03961	5.11245	6.61543
4.51321	3.54056	4.74268	6.88043	5.13572	9.7049	8.23299	16.9104
1.50549	45.0514	4.67424	6.52333	6.24556	5.14685	6.63627	6.10447
1.30069	4.84693	6.44267	4.86203	7.66838	5.08772	6.08704	5.9788
0.583212	8.72125	12.019	7.38976	9.58235	7.24567	5.30431	8.28126
1.48527	9.86494	6.60399	6.72553	11.1268	6.83878	5.44833	7.26015
1.79763	4.41474	8.81231	8.00041	4.97724	6.42849	6.23904	6.82457
2.03004	13.866	9.20323	4.25269	8.52244	9.50332	7.06644	6.60501
2.92234	15.9396	6.09457	5.00645	4.55881	4.53741	4.0695	9.26329
2.42459	3.52864	6.35928	5.13298	4.97882	8.34851	5.21573	15.361
2.3651	4.48841	6.09386	6.99469	6.16427	7.39011	4.97185	5.98487
1.82176	4.70668	5.19267	6.29748	8.01444	5.63185	13.4143	5.94935
1.51518	22.7006	4.79666	7.60017	11.7774	6.46347	10.1706	5.55144
1.24324	6.43146	7.94383	7.39296	4.97608	6.44808	6.79331	7.0631
1.67403	10.3141	6.39047	5.45783	5.93202	4.48999	8.95092	8.3374
1.25806	7.8978	5.06789	8.80457	10.0222	4.85176	7.47643	5.96019
2.12521	3.77641	5.31196	5.35449	4.34573	5.10337	5.14271	5.16813
1.50661	22.9991	12.5341	10.3774	7.95593	6.38457	13.484	6.39969
1.43902	5.41575	4.44944	7.22001	5.00125	4.63754	4.63592	5.09947
2.23765	4.35209	5.97199	6.03165	17.8886	6.56511	4.59348	6.24913
1.72875	6.08286	5.00546	4.04681	5.03591	4.98769	8.64921	5.83111
1.21265	4.94259	18.1423	5.04406	5.30251	5.37254	6.18587	9.27612
1.89126	6.85347	5.21536	6.40138	6.45384	7.91444	5.61965	6.10499
3.85981	5.37061	7.55668	8.2297	7.18489	5.17054	5.80741	5.03676
0.942179	4.36513	4.58664	6.62386	4.88739	5.49472	7.16446	4.22672
1.18269	5.73195	9.96044	8.89703	6.29978	4.44764	5.81308	5.57803
1.32827	5.26159	7.99937	4.40073	4.42648	5.12431	7.6327	4.27231
1.05274	8.35588	8.05919	11.394	5.23687	7.48824	5.2383	6.44025
2.23767	4.61027	5.80027	5.3053	9.56081	7.26211	9.06386	5.7058
3.05371	13.3293	6.70782	7.81105	7.23284	4.59	6.31498	5.90867
1.11029	5.81919	7.27404	5.27109	6.84939	11.4789	5.6354	22.8936
1.8666	6.54947	4.49146	7.19604	4.60491	19.2301	5.77619	4.97032
2.63711	5.6361	7.03674	4.5779	5.95202	6.36254	6.41242	7.73202
2.40973	9.46811	7.19602	8.32501	7.42286	5.25683	5.42979	6.68161
2.23202	6.67183	16.7252	5.87253	5.30738	5.96818	9.88805	7.77019
1.83181	7.87434	7.07908	5.568	4.4479	8.2211	7.9032	5.62125
8.40506	3.97682	5.37323	5.72323	5.30662	7.43481	7.13229	5.48978
1.18676	9.48656	5.1951	7.92663	11.7424	8.82423	9.6292	7.02024
1.17064	3.90197	10.3773	6.31656	5.7275	6.77977	7.68705	4.69944
1.16408	7.49407	4.59177	12.9526	4.90764	6.25033	7.23332	6.15408
2.36392	6.37084	7.28226	10.6979	5.28985	16.7865	9.7239	12.0275
1.27672	7.78063	8.22798	14.9368	5.99658	6.326	5.33945	7.89941
2.39995	7.25347	16.8835	7.73654	9.76219	5.35548	10.9431	4.63706
5.55169	7.12645	5.7949	5.62343	5.93306	6.30928	6.252	7.06676
2.01882	12.0039	6.53748	5.99946	9.50317	8.85461	6.29765	9.02355
1.62745	9.59677	7.17967	5.68609	6.01748	14.0262	6.21202	4.97124
3.07106	3.90457	5.28487	11.3706	6.76242	4.18473	5.60068	8.39806
3.59505	5.87142	14.9377	8.83067	4.96576	6.22429	8.2821	8.65329
2.01935	5.01119	7.67963	4.7706	4.97152	9.11851	7.28698	6.24659
1.65636	4.3504	7.35285	5.34418	10.4561	9.47712	16.8306	7.22701
1.7197	4.28182	6.43783	5.88983	6.35349	7.82109	9.0557	26.0671
3.16919	17.3112	4.51295	7.30145	4.79913	6.6599	6.12961	10.7024
7.76063	3.9318	5.22599	4.77396	5.68	6.7614	5.97296	5.63693
0.793398	4.36791	5.19506	6.46555	11.1111	6.43102	11.4576	6.57817
1.96851	5.78789	4.63954	10.3453	5.98878	5.36145	6.30688	6.87063
2.03314	4.77962	5.10061	7.33469	9.66691	5.99169	7.87285	4.96889
1.23029	8.24142	7.05941	5.06276	5.65776	5.9054	6.6108	9.04058
1.92073	8.57786	5.70374	5.54985	6.4893	14.3862	10.4524	4.89001
1.58346	6.80779	6.3852	5.14061	10.2443	5.3627	5.89277	6.14667
1.51445	5.6346	15.0163	4.53077	7.42482	11.9257	15.6567	7.12347
1.36497	3.95258	8.02933	5.24222	5.89692	5.4549	6.70417	7.41001
1.04494	4.8381	5.79475	6.86193	6.64996	7.59663	4.71437	11.771
1.53692	5.92042	4.27605	5.74281	6.91346	5.69775	5.02799	5.58251
1.94231	6.05389	6.08045	4.74955	7.58224	11.8519	5.32233	13.0307
2.9275	3.73998	5.5841	5.24155	5.43986	6.11051	4.39681	5.69993
1.03938	10.5874	6.11076	6.68164	4.69463	7.81015	5.96588	11.197
2.17822	5.20537	10.8289	5.76295	6.37042	5.48808	7.34297	5.83738
1.77499	3.66797	5.75389	33.4456	5.66487	4.82593	5.50998	6.14378
1.23516	4.14746	10.52	5.99568	5.84963	5.19594	5.72908	5.93412
1.73535	6.50676	5.39023	6.22358	5.9215	9.01851	14.0685	4.6033
3.72605	8.6771	6.35346	4.77481	10.062	6.61591	4.69235	5.78249
1.26781	4.14839	6.33017	6.72817	4.94413	8.1553	30.8937	7.80284
2.19566	7.62143	5.23438	5.7614	10.4182	5.45321	4.61161	7.60516
7.84443	3.74564	5.50302	7.66528	6.51366	8.39817	5.63943	6.56892
1.49323	5.82936	5.90795	5.57096	4.77334	9.87884	7.41837	13.6892
1.49696	4.86986	5.48443	6.88528	10.1742	7.5018	5.66751	7.22606
1.99213	5.39034	9.51899	8.04629	6.29457	4.61507	11.41	6.37151
0.87424	2.72149	6.37928	5.16137	6.44456	5.13045	5.04837	6.93203
2.31713	5.25576	9.44353	11.7494	5.48006	5.78712	4.76068	8.33675
1.64759	7.60389	5.53522	9.21363	5.81812	5.54625	7.63235	25.3238
2.55771	6.69974	4.74613	8.11204	5.54365	6.08504	13.3777	8.43063
4.29951	9.09866	6.16996	4.07224	4.49712	6.21037	6.07678	5.37895
2.78923	3.95573	4.16924	6.35975	7.96099	8.83294	6.41621	10.7586
1.07524	7.47425	10.2877	5.96696	5.89909	7.32689	6.94832	5.51297
1.21994	4.85709	11.0962	5.15938	13.1143	5.25739	5.56778	5.23825
37.1479	4.59859	6.84119	9.91774	7.79718	5.63898	4.8662	10.6114
5.01841	4.00806	5.16516	6.34576	7.72603	4.78231	6.55588	6.29597
1.96525	6.04177	7.50155	7.4551	7.29941	5.51005	6.45513	6.06306
1.62237	10.3076	8.61761	6.10947	9.63096	10.6938	11.0662	12.1999
1.54398	3.76046	6.47389	8.20747	4.69789	5.05677	8.0393	9.05897
1.32147	4.15372	6.76392	6.9354	11.3468	6.4649	5.77534	7.00046
2.16574	7.33571	4.01933	4.70205	5.56712	7.58268	5.31313	4.58836
1.35556	5.64207	5.33481	4.85871	6.59216	4.32152	18.283	20.363
1.67288	8.54003	4.57872	6.11435	16.1662	4.3496	5.84748	5.95523
1.41173	4.49006	6.08232	6.20644	6.17948	8.6948	5.73053	6.91286
1.19104	4.51887	6.89117	7.72074	34.7951	6.29784	5.53784	6.66919
1.22273	19.3312	11.7194	5.67267	11.0963	7.20548	5.82962	6.97595
2.15034	4.78538	5.0284	11.6968	11.5623	6.0451	5.44868	6.21003
1.37847	6.3922	4.89368	5.65249	8.75609	6.06049	5.3312	4.73211
1.25853	9.43555	5.13159	5.73275	5.77735	4.7278	6.20085	7.16978
0.762866	6.01707	7.15856	6.87244	5.03421	7.85574	4.84127	6.45807
3.14194	5.25992	5.23355	12.5249	5.8813	6.14163	5.07689	5.8944
1.90013	4.03366	4.41282	5.09601	4.54295	5.42962	6.93086	5.68338
2.55331	6.44754	13.5928	10.0296	9.10128	6.81941	7.11869	6.7178
1.20208	4.97976	8.22741	5.81118	6.77512	5.7909	9.2398	7.62443
0.792913	7.06864	7.43187	5.54832	4.53918	10.9548	8.73025	5.22668
2.81628	5.90498	10.0544	5.0055	7.89169	6.35737	8.17151	5.45053
1.66128	9.09606	6.04491	5.06083	5.09404	6.10887	7.34803	5.82029
2.2767	4.60039	8.07138	7.75388	5.83949	6.98359	7.87259	7.29359
1.79525	5.54311	6.1246	6.26525	6.6563	8.14921	41.9491	7.45412
6.96381	7.16833	4.76205	4.8865	6.79735	7.49824	11.2614	14.7866
1.75044	4.32692	4.66852	9.25456	6.63699	7.22821	8.84217	7.90701
1.35368	4.98401	6.70539	6.53775	8.38559	6.45974	12.4861	11.7125
1.26717	9.51245	3.79894	4.64758	10.1625	6.79751	8.52714	8.93169
7.82602	3.94845	9.00835	4.19811	11.672	6.65179	8.64826	7.79216
1.94172	5.33513	5.47635	12.7808	4.987	6.49627	14.3067	7.93033
1.87567	10.1325	4.59527	9.88014	12.7322	5.43465	5.05965	4.96635
3.08179	9.45454	6.26549	4.95046	5.98448	15.186	8.93595	5.20612
2.11161	6.43299	6.12107	6.52924	12.8633	5.53004	5.16017	5.23071
1.34101	4.17416	4.11773	6.57765	4.9291	7.14487	7.54735	6.6664
1.25322	4.41083	5.78779	5.57458	26.028	6.7632	5.59188	5.26601
1.74591	4.49022	8.52735	4.77613	7.56821	7.86151	4.74807	10.331
1.54	5.75539	7.59627	25.6194	7.91292	8.17224	4.49964	5.92476
1.57066	3.91033	6.55792	10.1347	7.41508	5.88745	12.8587	4.32883
1.4414	6.64934	20.6391	11.6699	5.7044	6.20672	13.9814	6.79642
1.375	6.15489	7.27824	6.10498	7.0431	4.57078	5.46987	5.5588
1.28552	4.58876	5.42414	5.46574	5.33251	7.27186	6.46648	4.78919
6.2155	5.65232	6.50509	12.4172	5.8199	4.63047	6.50716	5.37851
0.829077	4.38286	6.16971	7.26422	5.60084	6.66123	9.53806	8.90827
1.3639	3.4445	9.39946	5.9428	8.16594	5.93108	6.24437	5.9094
1.43517	4.37023	5.96287	7.76563	9.12274	8.4371	5.78104	7.64323
0.986549	7.55027	4.23228	5.58528	5.98177	7.48417	6.01952	40.9989
0.878438	8.25074	6.51724	6.93741	14.0585	6.29144	7.27188	8.47814
1.77312	5.42578	5.66774	5.69635	5.47197	6.30917	5.41725	4.27188
1.41458	4.96262	7.93202	7.03404	4.96832	5.17428	5.22326	9.56758
1.22453	5.43318	6.64216	4.81665	7.71532	26.3517	4.58681	6.19679
1.68631	9.53204	11.9381	5.29071	7.33161	6.72948	8.79058	6.67811
0.866131	9.73179	9.07047	4.76335	6.05672	9.92959	5.33774	7.30669
9.14006	5.29159	8.84916	4.55577	6.07392	8.95027	9.64702	9.13122
7.45069	5.39455	5.27529	5.60616	5.34827	6.28719	6.55311	6.49859
4.67303	6.30206	10.5252	5.07646	15.4196	6.52378	5.88462	7.68577
1.38434	4.69611	4.32187	9.24494	9.69255	9.69502	5.85949	6.16943
0.926057	10.1566	6.21657	6.75861	5.10249	7.99839	5.53466	5.18073
1.71358	6.79202	9.0703	5.12394	6.79664	7.02445	5.74403	9.85317
1.69901	3.97265	6.26515	6.30599	6.90121	5.59948	11.4918	9.91303
2.41629	10.8673	5.85249	6.50755	7.85652	5.30238	6.68202	9.9068
1.60343	6.62307	8.95483	8.41646	5.31085	6.04621	7.65174	5.99589
1.33758	5.98047	10.606	12.5624	4.32433	8.48692	6.5715	5.58203
1.53176	6.28639	4.18849	6.72082	6.29737	6.48985	7.06549	6.6546
2.9237	6.91136	4.6649	5.6481	7.26943	14.2296	9.77752	8.74488
1.61904	6.55278	7.2225	6.18105	8.21883	5.19749	6.31683	6.65299
2.8885	4.58859	12.3561	8.57226	6.56768	5.48124	5.83007	7.99918
11.4163	5.81165	5.18237	4.60477	5.07479	5.23019	5.80346	7.45039
0.639984	16.5282	5.17139	5.66269	6.51784	4.88908	8.3943	8.64563
4.69894	8.53678	5.31126	9.22012	4.9951	9.98727	4.96712	10.0153
2.32144	9.83174	6.12937	7.57604	8.70648	7.00008	4.35851	38.3286
1.58318	6.4249	5.2341	5.77812	5.7975	7.62226	17.7325	5.50264
1.37087	4.11492	7.65882	5.102	7.97357	6.63818	10.7927	5.62737
9.55382	7.63	4.92947	7.93237	4.92326	6.08352	9.82493	6.91385
2.72175	7.99123	9.44136	4.85917	7.25793	6.29348	13.6548	6.48314
1.30947	6.58987	4.93897	5.50517	5.23332	5.3444	8.94573	7.52043
3.16225	7.62702	7.34254	6.0218	10.0365	5.50343	7.23304	14.2588
3.10033	4.80796	5.6712	5.94617	6.37226	7.26373	6.32806	5.18936
1.43362	6.25115	12.1737	11.9956	5.23261	5.55668	6.37495	6.74743
23.5605	5.54629	5.44365	5.90933	13.2798	19.4282	8.26855	12.2337
1.01293	8.83876	5.07247	4.60104	7.27772	8.49233	6.59677	6.11138
0.879951	3.84546	3.92856	12.8141	5.69243	6.14125	5.46052	7.62037
1.70999	6.00208	8.49895	4.19667	19.0289	5.36082	8.47646	6.44551
1.64676	4.55754	5.922	6.78425	10.3458	6.26212	5.88105	5.30485
2.34449	7.24743	6.08963	5.69362	4.98482	9.91384	5.35033	4.75473
2.63266	4.75327	8.35037	7.36907	5.09156	8.32608	9.93354	5.11035
1.22321	4.95111	4.2853	15.4319	6.37193	10.9902	5.78684	6.74484
1.66346	7.99023	6.61929	7.69138	7.06253	6.51093	6.96643	15.1537
1.07708	5.47946	5.43144	5.40184	5.82914	7.86373	5.3176	5.12761
2.1681	3.53156	6.7138	5.24031	5.19143	4.56441	4.16843	9.80342
1.74133	16.2132	5.60702	8.04014	4.37268	6.94715	5.98896	7.5392
0.948673	4.61227	6.13737	17.8489	5.90387	5.95234	10.39	5.42313
1.14622	4.43512	9.70643	8.80486	5.16901	12.0794	5.22357	6.77883
0.937433	6.23994	5.5415	4.66321	5.54794	5.32851	4.84919	7.57077
2.78427	6.3694	4.82435	6.89291	6.149	8.95261	5.03353	8.51613
1.58767	10.2548	5.60163	5.33711	8.59889	4.68057	9.69891	7.15882
2.56202	4.45001	8.17529	9.28619	13.1179	5.80763	7.38592	4.36078
2.24198	6.32965	4.67331	5.95244	10.7495	6.84512	5.85574	9.8283
1.16987	4.18781	8.27043	6.38246	4.86912	5.96342	5.03835	11.8431
1.03629	7.13428	7.3066	5.46309	4.03739	5.98438	6.67471	6.03512
1.55526	9.13034	11.291	5.82105	5.69892	5.82289	5.24079	5.55649
1.00871	4.10202	7.55134	6.71951	4.37963	5.12168	13.0969	5.45934
1.85947	3.99166	7.98362	7.51002	6.32546	8.60561	5.68137	10.1649
1.91514	5.27765	7.68682	6.92955	10.7746	6.74311	21.756	4.97314
1.7761	4.85325	5.90264	8.17081	8.61575	7.39454	6.40235	7.4441
0.924455	6.57306	11.1785	7.39965	5.99916	4.2956	7.5217	5.57702
1.33164	3.88909	4.01816	6.34869	5.55753	11.2676	5.27689	5.57241
1.82251	5.78944	10.7705	7.17406	6.45831	14.6994	6.30935	9.6144
1.34171	4.41808	10.3988	5.90226	6.44681	6.95787	6.68508	6.00143
2.2602	5.04324	5.35791	4.56168	6.62767	6.395	6.79664	8.56765
1.5851	4.79011	5.9355	7.9575	7.28542	6.01532	10.4234	11.3875
1.44612	4.9975	6.41375	9.27186	5.99063	5.36685	6.43872	9.61857
1.4602	8.25578	10.7165	7.01233	5.77767	6.38098	9.59041	5.88044
2.23896	5.40686	6.60972	6.02206	6.9288	4.54544	3.92735	6.3408
1.28058	7.28336	5.57476	6.23774	4.97532	5.6979	7.22767	4.77825
1.21762	4.48395	5.22485	5.5515	5.58595	14.7633	5.99886	8.7888
1.80904	5.86525	8.28297	4.67945	12.0831	6.98944	19.2439	7.97063
1.60011	7.34056	10.1349	5.10545	7.96451	8.14762	5.06852	11.7209
1.0419	9.9634	6.1043	6.46179	8.78729	14.046	6.58419	10.7112
3.33568	5.612	5.27522	5.76588	25.7465	5.8413	5.5999	6.09002
1.28332	6.50648	9.20795	5.32871	5.24567	7.10348	6.30128	7.45176
2.8571	7.44352	4.46483	5.71647	7.58076	5.88062	5.13979	7.57302
1.20492	20.3716	6.26453	4.89542	4.14745	5.16789	6.48691	5.67649
1.87215	6.3852	7.84568	4.49713	4.85423	5.06783	4.59118	6.89991
1.25633	5.11756	6.00662	4.92048	10.9947	16.2175	6.00359	11.9143
1.64255	6.18597	4.70651	5.83627	5.03404	11.8025	10.677	11.2134
1.37401	5.8577	5.61403	6.69611	6.80819	10.8366	6.05423	7.89408
3.79168	5.50563	10.7265	16.7814	6.14884	6.89634	9.26607	8.32042
1.34678	6.05064	5.23833	4.5137	4.57468	5.6845	8.16005	12.1251
1.48282	8.32389	5.30888	6.38048	5.29389	4.80745	6.4527	5.89218
1.42996	4.05069	6.16556	8.76331	4.73623	7.60337	5.30011	5.19253
1.67895	6.87941	3.53073	31.7061	12.6321	4.74989	4.78109	5.05065
1.55242	10.6994	8.22797	5.96411	5.63557	7.82119	5.49115	4.75198
1.95827	6.6472	9.57484	6.27145	5.37662	5.5523	5.97353	9.82773
1.13257	14.6005	11.2398	6.49413	5.14704	6.22626	5.69038	5.16856
1.49669	5.69979	5.47282	6.26932	6.92141	6.87057	5.28231	10.9379
1.03336	6.27066	6.94609	5.46939	11.6176	10.6637	7.27018	6.74216
1.55036	5.05965	7.10289	5.12511	13.3283	7.20177	6.97204	7.9136
3.70201	5.68632	8.14854	4.27835	5.97475	6.38049	6.94408	9.12682
10.9651	5.52113	6.43135	6.27042	5.18604	10.5723	6.8435	4.54289
0.862625	3.8801	10.5167	5.17512	8.76961	11.1058	5.60904	6.46234
0.972552	4.33843	8.27255	11.9127	5.59552	21.8938	5.14463	4.67782
1.36047	8.78268	11.281	6.05651	5.70177	5.77814	7.95828	6.46085
3.72171	4.97462	7.52375	5.14028	6.58315	8.36666	4.77715	5.77525
0.845807	4.53963	6.07813	5.32927	7.13121	6.00001	4.86888	5.16562
1.50946	9.46973	5.56431	5.76873	7.68005	4.90633	5.26693	7.10209
1.76374	6.39416	7.69292	4.89438	36.4702	12.9772	4.92737	6.08638
2.67517	10.2906	7.28704	9.63113	8.41389	5.13487	5.12211	8.04868
3.22451	3.62537	4.96531	6.53864	7.90213	6.28498	14.2516	8.76702
1.64248	6.83506	11.3737	6.75079	6.31746	5.70107	6.95226	5.62385
0.7981	5.85336	6.71753	5.41615	5.56165	26.7975	12.7708	23.3301
2.01213	7.46739	7.56244	5.06303	5.59019	7.53874	5.32775	6.04792
2.4854	3.22016	7.87242	4.89928	8.0817	5.08179	4.90619	5.31732
1.80198	4.53414	6.87275	6.17359	5.88861	7.51726	6.51421	6.52132
2.03228	7.23695	4.54427	8.70152	6.722	5.59186	5.19423	5.50692
1.65431	5.8712	5.09637	5.06485	5.609	7.3627	9.43564	7.93321
1.12784	6.01369	5.18387	6.88644	7.82316	5.82374	4.78487	7.73012
1.33397	16.7543	4.95296	5.68918	7.16861	6.58032	5.11736	5.96332
1.10031	8.67017	6.44446	5.57288	5.66005	6.4893	6.39771	7.45811
3.45645	3.91459	6.17046	10.3876	7.85158	5.48807	5.60566	6.32922
1.30858	4.97845	7.50374	5.10984	5.67312	9.02143	10.5516	4.28064
1.8127	8.97133	4.8813	5.22476	5.4082	5.52365	5.02662	9.30194
1.97981	4.72768	8.08316	7.08941	6.44179	10.5117	5.4	6.67063
1.14863	4.13091	10.1334	7.97367	13.8751	7.28483	6.93062	8.37501
0.705929	7.14347	5.00305	7.7467	8.71313	7.89357	9.22179	7.27307
0.98303	6.44907	5.61808	9.447	5.5017	6.59853	11.6611	5.13065
1.82685	7.20301	6.1936	6.57606	7.05181	5.25734	7.86837	11.376
1.82924	16.2678	4.5126	5.72347	8.79943	5.02677	8.97271	13.7296
1.46453	5.67663	7.11313	4.86077	6.69068	6.72608	6.78178	7.58087
0.784933	3.59179	6.43392	6.98298	11.5093	5.99614	5.38404	5.3771
2.73572	5.5983	6.58802	8.67006	11.624	9.69455	11.7266	5.05428
1.5975	4.21986	11.9266	8.04881	5.9136	4.42767	5.04712	10.7115
2.44996	5.5825	5.04022	12.3089	4.72218	13.5396	7.7004	4.65045
1.15491	5.07633	6.93322	14.3138	18.3753	5.57851	7.47489	6.80736
1.43606	4.36904	4.52335	6.08961	4.22486	5.11092	7.91089	7.67669
1.75323	4.10408	6.35667	6.15915	6.79278	9.69489	5.5666	4.69835
2.65243	3.3987	9.3107	5.28834	6.71534	18.0033	5.60843	6.47884
1.75848	4.82274	5.50784	4.77689	5.08197	7.05773	10.5696	11.05
4.01229	5.30303	4.80523	5.83769	5.37365	9.60042	5.48251	5.3587
0.982664	4.73666	5.48636	4.77795	6.07074	5.84165	5.96282	4.00043
1.76024	4.2714	8.80982	7.97778	5.41713	5.57792	4.7171	4.33209
1.06885	4.64676	7.03075	9.77873	5.82055	8.704	10.5879	5.54378
2.14572	17.3235	8.68104	8.36329	10.779	5.30972	4.79243	6.66672
9.3831	5.0433	6.54516	5.39336	6.05255	7.81558	9.48432	9.05807
2.47213	5.84782	6.77402	4.58999	5.23195	5.24539	5.54875	8.03928
1.82361	5.55253	5.43821	6.39149	4.91273	5.45725	6.58261	7.02143
3.60905	6.79969	4.47986	13.3413	6.64731	5.50946	5.78964	4.72779
1.32662	3.6062	4.18982	5.18901	5.53184	5.08277	6.12067	9.06286
1.30815	3.84695	8.98032	5.00935	4.80231	7.91521	5.47342	6.46191
1.27856	12.3658	6.27704	8.62482	4.53683	7.00475	11.4805	18.3146
1.70418	5.04077	7.82269	6.17865	4.90891	5.96856	9.05552	4.95683
3.17251	5.50557	5.81717	6.36107	9.28963	8.55789	35.8943	6.05954
3.94814	9.77915	7.61467	5.04615	5.6096	10.0169	5.38479	4.24168
1.52031	9.24065	12.9275	6.82378	25.3396	8.26875	6.98325	6.73491
2.67249	5.99333	8.55865	5.01554	9.67107	8.14148	6.89146	5.86115
1.63499	3.71158	8.54032	5.96884	12.1949	5.37716	8.2017	7.06165
2.18532	7.73306	5.31813	11.7919	6.7134	6.57008	8.31538	6.15085
1.33793	4.60809	12.2954	4.71303	5.80669	6.53547	6.70185	12.1364
1.52213	5.79404	6.94952	7.50333	5.87731	6.46497	7.05397	8.51748
1.31068	13.1678	5.60121	4.85208	4.98243	6.91106	6.71642	5.43189
1.92236	6.50591	4.52422	5.81436	7.77422	5.70483	5.59401	10.9087
2.26482	6.25589	6.97081	5.20806	5.42594	5.05834	6.97939	14.622
1.30721	27.6374	3.92239	7.39589	4.74703	5.48733	5.48627	5.42758
1.6991	15.4297	12.2759	5.73104	6.23122	5.3041	10.2896	7.67533
1.99666	3.23072	6.8557	5.54022	6.99741	6.61975	5.56938	6.69028
1.26204	3.56198	4.99178	7.46426	6.71174	8.79437	7.43414	5.20125
1.12495	3.95662	9.11989	5.11433	4.31225	4.90045	9.53692	6.89305
2.12568	3.64261	4.60623	6.01494	5.42649	5.5042	9.57583	10.012
0.991332	4.27262	5.79951	6.14573	8.37513	6.45731	5.71537	5.29711
1.61229	5.15171	4.77779	13.0187	7.31146	8.30283	5.01772	6.30495
1.40857	4.59449	9.145	4.80645	7.72293	5.22728	10.0202	4.7401
3.37589	4.34462	5.37924	4.92357	6.88943	4.40986	5.30843	10.41
0.830676	4.2637	5.54208	9.50839	10.6956	7.02719	6.55128	5.98633
1.52155	5.24562	9.17085	6.95118	6.3035	9.05337	8.9135	5.22658
1.73839	10.5039	10.233	4.35619	5.09629	7.00498	7.27794	6.72267
1.31961	4.33819	5.4309	5.60812	6.91802	6.70066	6.54001	5.45648
2.22692	12.4025	4.01728	5.61817	5.4249	5.86267	6.33867	6.79293
1.6638	14.4719	6.67437	5.62718	6.34209	8.12518	5.28996	5.93405
1.8547	5.32193	6.28091	11.5059	5.76498	4.76099	5.75396	4.61657
1.43485	5.2961	6.68092	6.53841	8.13805	6.34979	5.23292	8.09466
2.84949	7.50635	8.12432	4.88649	8.86555	7.84624	6.744	7.96603
3.47048	5.26905	4.74347	7.37664	5.76127	4.51449	5.18976	7.3044
2.25672	4.10144	8.41425	5.36214	21.4965	4.78547	5.20774	7.0768
2.14075	5.7054	4.53548	10.3398	6.59528	6.22013	5.88572	5.46657
1.27653	6.30623	5.4306	12.2545	4.20563	7.79227	9.95624	5.23015
2.2747	4.55978	5.69779	6.30916	7.85422	7.63261	5.63257	4.9943
3.44476	5.81239	4.31044	7.96873	6.613	11.6769	5.10151	5.2974
189.855	3.29454	4.80559	5.85414	4.86588	11.027	5.84685	6.23436
1.03162	5.52093	6.00004	7.17235	8.90955	5.58654	5.12085	11.0753
3.52412	8.53245	4.68908	11.9862	11.004	5.97958	8.01687	4.66363
1.25481	4.82962	7.53109	5.51702	5.47154	5.91896	6.89472	8.07555
1.53099	2.92389	5.55508	6.03771	5.25464	5.96194	11.4212	9.96831
1.4754	5.65813	6.23391	5.55535	6.35412	9.22988	8.40124	15.0715
1.63076	7.60923	11.6533	5.77782	7.00037	7.17932	10.9846	5.06161
3.65046	7.67072	7.62424	7.77875	6.57302	7.25544	4.83163	12.6089
1.02876	17.3963	6.85701	8.27935	10.3157	5.81761	7.40909	6.55615
1.3347	7.74743	4.88832	6.43305	5.16683	7.62528	5.4857	5.88132
1.28342	4.26897	4.73026	6.18981	9.88927	6.06245	5.90086	15.9675
4.53644	4.34026	7.7672	4.67948	9.6939	6.08124	8.43251	8.03137
0.868318	7.95694	6.6112	6.22763	6.86052	5.28706	5.21985	6.61844
1.00689	6.43952	10.0951	4.62411	8.11506	6.43689	9.32185	7.93316
1.76617	10.7001	7.3635	7.69911	5.16446	4.63192	5.38514	7.05243
1.60508	6.54814	4.66215	11.4432	10.4793	6.00463	5.6822	7.14487
31.9381	5.51242	4.88525	6.71526	6.68132	7.33795	6.03677	7.72317
2.47532	4.7383	5.96289	14.3381	6.85474	4.75866	5.24239	6.0333
2.03201	20.1318	6.58257	15.2566	14.8855	4.88055	4.81037	35.5627
1.82437	4.0323	9.26398	7.21626	8.41141	8.52453	14.8592	5.53199
2.22345	5.05465	7.78448	5.28377	4.76641	5.23089	8.48642	6.92801
1.63542	5.42906	4.89742	5.50076	7.557	10.1592	8.27841	5.74454
1.11253	5.33209	10.2041	6.3729	4.70621	8.79123	5.81262	5.65191
1.59367	5.22899	4.49932	5.76772	7.49353	5.48406	10.1303	10.655
2.76707	6.52863	7.11701	6.63775	6.92574	10.3292	4.23165	5.78634
1.45264	13.4967	17.7085	7.96614	6.22575	12.7157	4.99633	6.19518
1.13629	4.44272	5.92653	6.88433	6.57111	7.28708	9.64287	7.2156
2.83952	4.34532	6.11966	10.8768	5.26812	5.55826	9.79388	5.00921
1.22023	4.34857	5.91378	6.58833	5.91123	11.1077	6.0371	5.2438
2.21896	8.42563	6.62066	6.85424	7.21665	5.76088	6.17112	5.22094
1.61381	4.87768	5.48235	5.39708	6.52486	5.76421	6.32858	6.21624
2.72373	3.98398	4.79888	4.93229	4.73099	5.47186	5.47685	13.5017
0.988973	6.26477	6.56187	5.49822	6.90329	7.1314	4.77604	5.54551
1.09837	12.1566	4.34145	4.74984	4.01192	9.04321	6.4513	9.29776
1.00499	8.25409	4.46953	7.16756	5.75112	6.73248	7.48022	5.47382
1.67365	4.42444	6.13293	10.5214	6.74688	8.04863	8.51918	6.06069
1.76461	6.36637	6.02722	5.35651	12.9674	7.96263	6.19162	7.62729
0.929415	3.82975	5.13396	22.9063	4.79383	5.68921	11.5059	7.10155
1.40646	7.90253	5.25157	10.9322	5.43482	7.32461	4.8011	4.49858
1.51071	9.22457	8.16739	4.71146	7.79135	19.0624	5.03523	4.96817
2.49815	3.73036	8.91086	5.43122	7.13222	5.20659	5.73492	5.62523
1.07374	4.74822	6.28678	10.7435	5.63546	6.12165	6.33444	5.8942
1.11116	5.30789	4.7849	5.84907	8.86219	8.81992	5.4589	4.39102
2.59274	81.5378	8.37926	6.94811	4.84078	5.36929	4.05166	7.47198
3.64572	12.6082	5.68801	7.18038	4.9814	9.54794	6.92186	7.49059
2.22289	6.1461	6.78912	8.82392	6.05448	4.94296	8.13898	4.71039
1.78532	10.5505	5.46793	5.61825	5.37321	5.36336	5.02851	6.17881
2.28737	20.7194	4.0861	6.13258	10.3065	6.58367	9.8099	8.93118
1.64476	65.5609	4.96267	6.46584	11.4144	5.17683	5.6801	18.8726
1.76813	4.08954	6.78813	5.49027	5.45477	21.4139	9.14541	5.05611
1.95236	6.29385	8.62693	6.48726	6.25575	12.8156	17.7277	9.03016
0.599432	4.88624	8.30909	6.97846	5.55915	6.05658	12.3434	6.39608
2.45668	9.21638	10.6374	8.10254	21.6271	4.57007	5.28946	6.48146
1.23182	10.9046	6.13281	5.18797	4.80241	6.96425	5.21404	8.83075
2.51001	4.00463	6.94764	16.5534	4.92322	5.29523	7.99259	7.57029
1.81579	4.33953	4.95321	5.2788	8.38063	5.0461	9.39691	5.29138
6.0059	5.55295	10.6835	6.14791	5.14872	13.6716	7.3713	6.45149
1.97335	4.93404	7.04199	5.56322	5.56508	13.9056	9.28157	12.4216
0.707013	7.88011	5.80886	5.30699	7.4852	7.91614	9.27587	7.27143
2.26921	7.37965	15.32	12.2781	4.89059	4.70447	10.7123	5.3412
2.70138	5.31941	5.06821	6.57148	4.71784	6.34529	7.65592	8.71098
1.71503	6.09773	7.66488	4.81649	5.53067	7.03494	6.62383	8.34997
1.86107	35.0022	4.41829	8.56045	6.01808	16.1096	6.68705	11.8251
2.45006	6.60458	6.0646	10.4269	6.00893	7.00395	5.27962	62.7092
1.72867	6.4302	5.85176	8.38785	7.24851	11.8884	9.71586	5.58883
1.41419	6.89973	5.14009	5.36478	6.14954	5.66337	16.5759	8.74889
2.61305	3.51348	5.00103	9.94526	9.42231	6.0415	6.97601	4.65381
1.24507	5.0479	5.77559	5.37986	6.70383	9.78475	7.7243	4.98403
6.93897	5.35485	4.25066	5.40475	14.4881	7.94944	17.6753	5.11694
1.56459	5.00624	4.39113	5.49718	8.31022	5.19188	6.64849	6.47542
1.50092	6.30797	37.9898	5.82049	4.47151	4.90048	13.7276	8.69083
0.980901	6.99273	5.85272	6.04086	4.59452	8.00911	9.27755	8.21909
1.99765	3.32667	9.2219	12.804	4.72349	8.26114	9.98054	6.35182
1.77241	4.89549	4.74274	4.84372	8.29926	5.09522	7.09858	8.21774
1.0833	4.06658	4.97471	5.64659	4.71172	6.95566	6.21096	7.24656
1.25505	4.15325	12.5607	6.34096	5.34015	8.89214	6.49922	6.62908
1.93165	19.8946	5.45721	4.8221	6.65862	4.84608	5.37726	6.05685
1.6065	6.7743	5.44165	6.23322	5.7964	5.92328	7.09299	5.49971
1.74885	7.36055	13.1205	7.04405	6.61058	4.86387	5.19283	13.1093
2.42771	8.3861	5.09184	7.97565	6.70786	5.19968	5.38566	5.30918
2.32101	5.63881	9.00753	4.63093	5.08431	6.38231	9.84055	7.11951
1.23553	3.09441	13.6686	13.1788	9.19131	5.06339	5.25457	22.9383
1.371	3.69875	5.09179	4.52842	8.31087	8.81339	9.85545	4.84243
2.17262	4.8967	5.85036	5.63207	6.13749	10.5686	6.95886	4.20458
2.85936	6.46026	5.09896	6.49315	5.34184	8.3058	9.36268	6.7314
1.99998	25.977	7.76566	7.51057	4.71786	10.9412	5.24601	7.30143
1.41308	12.6877	11.5891	6.97032	6.14206	5.80219	12.2055	9.218
1.60692	4.08943	4.88709	6.62172	20.2742	12.3761	5.2789	5.39308
1.52849	6.49215	7.09136	5.04584	6.97027	7.44532	6.39155	6.93799
1.09053	7.40211	5.80774	6.45763	6.68443	9.22227	7.22821	5.11464
1.02033	6.14073	8.02619	9.90939	6.06652	5.3164	7.91881	6.26113
1.34671	6.93036	4.959	4.33859	7.18463	5.68048	6.43621	5.82016
1.74781	5.39615	5.32835	6.45261	5.42663	5.97202	6.54266	7.94342
4.08212	4.77076	5.1284	4.62827	5.33994	7.16438	4.85356	5.34357
1.84932	4.03442	5.99785	4.6868	6.14264	5.77484	15.6754	8.63147
2.63124	4.85705	5.49519	8.58925	4.70793	4.50823	11.7882	4.95572
1.4013	8.03562	6.6643	6.20441	5.84136	4.63139	6.425	5.96867
0.948102	4.39263	64.3735	7.32796	6.24569	5.98148	5.57086	9.42685
2.07234	9.75098	8.11151	5.61813	5.40558	7.50144	6.18833	7.48462
1.10292	4.60203	4.69744	5.12134	7.45824	10.4656	5.42475	5.81993
1.18439	5.92017	9.18673	5.25579	5.34656	6.20863	11.8108	12.1772
1.60717	3.96574	6.84435	5.39265	6.63832	6.77683	4.91521	7.40829
2.11567	12.4289	5.6854	5.58197	8.13898	7.69224	5.3238	5.38006
1.61749	4.4257	9.33821	5.36012	5.39097	11.7368	7.73872	6.43092
4.0223	12.2992	6.06279	5.7697	12.4193	5.12542	6.75768	7.83145
1.48242	5.49235	6.22433	6.17099	7.13756	4.77294	7.07102	9.66491
2.70107	7.8719	5.44337	7.00417	5.73564	9.3057	13.518	5.06233
1.45678	4.76461	5.73629	6.90881	5.47662	22.0912	5.24764	6.47989
1.03383	7.18588	5.39174	5.37514	23.6218	10.6786	10.2423	9.72232
1.37967	9.86645	9.91435	8.85761	5.43877	7.06552	5.1426	37.5195
1.19769	5.16241	4.48932	6.1195	8.42886	4.66358	5.76702	13.2395
2.34971	3.95399	4.5309	7.80417	7.14928	6.77195	9.49916	8.07116
1.08429	5.75229	4.66093	8.46282	7.29982	5.54439	5.22346	7.30259
2.17713	5.13258	4.42902	5.82523	6.50641	10.6484	5.94202	13.2161
2.06463	3.85168	12.1504	4.98693	4.90228	4.63966	5.54203	9.13284
1.3483	9.99679	4.27924	5.6253	5.19563	11.3432	6.01237	5.74568
5.74935	4.95148	7.32001	10.769	8.07999	7.04487	5.18424	18.6195
1.05978	4.95524	5.6344	6.18214	4.68122	5.08004	6.81002	8.14976
1.03283	7.72211	8.31805	4.4384	4.53419	8.89379	27.311	4.89666
1.29015	14.9092	7.4896	6.34633	5.30136	9.61529	6.22173	5.33842
2.38301	5.57962	10.9556	7.59238	7.54932	5.84725	4.69528	8.78219
4.78034	7.21672	8.98785	6.10827	6.33728	7.49938	8.75547	5.41092
1.39721	4.75022	5.67962	17.7091	10.4297	5.51764	4.56771	15.8796
2.67795	4.21156	11.9639	4.62599	5.5135	9.87063	5.82187	6.00619
3.80355	4.86045	7.59668	9.14199	5.91715	7.25995	6.71203	5.54708
1.55709	5.7117	5.46784	5.46307	15.3902	6.07027	5.76688	6.08235
1.2892	7.29013	5.52135	13.6963	4.91663	6.25781	6.73604	4.83465
1.40103	11.8475	5.13995	7.29167	6.45842	7.26732	7.36439	4.89253
1.6699	4.60237	5.27605	5.51745	4.70087	9.65568	5.87316	9.87008
2.26626	7.53651	6.95564	6.51948	5.51985	5.7436	9.433	5.78449
8.93068	7.1582	17.1737	5.96664	5.5998	7.83022	5.27468	5.29812
1.33885	5.66949	6.56932	6.99419	6.99405	6.56534	6.71191	5.35303
1.59011	5.27792	11.016	6.70498	6.67138	7.98361	9.77889	6.17895
0.779802	4.8729	4.8481	8.44724	5.80042	5.37728	7.1077	4.57038
1.62515	5.7421	8.46119	9.79053	6.07567	10.3357	6.59923	8.41136
1.16942	4.93275	6.46083	4.65948	5.55973	4.84603	8.55688	8.92494
1.33913	22.5904	5.29547	11.6056	8.64389	9.43157	4.50508	6.6702
2.19308	6.05433	5.78645	5.9069	5.23934	14.0174	4.89786	11.2009
2.31703	8.42882	5.54822	6.84596	5.40602	6.23171	7.47185	5.74578
2.0124	5.95958	5.5584	7.31588	7.8209	5.74246	4.99591	10.7977
1.95006	5.24558	5.15535	8.40527	4.69641	7.37433	7.4566	9.32854
1.05714	4.46658	6.30559	5.70841	7.08652	11.384	5.94407	6.28367
1.79917	18.3348	16.2267	4.63835	6.9391	6.59165	5.76282	7.81173
1.39306	20.4356	5.18617	5.93783	6.09456	7.57004	7.85578	7.79034
1.31197	4.28237	4.647	15.2572	5.61717	12.3036	8.4196	5.5266
1.07936	4.25957	4.2485	6.80906	5.72417	10.0366	7.35388	4.98102
2.45233	4.10563	4.46363	8.57122	7.28511	5.39078	6.2711	8.52729
1.19501	4.4885	6.90577	5.99584	5.32075	9.04279	6.48174	7.71579
1.75294	11.862	5.30679	4.52271	12.9877	5.86681	11.4361	7.21626
1.52081	6.19514	8.72329	24.6	6.65592	5.84201	8.20309	5.27598
1.73709	4.46741	9.83472	5.50742	8.82964	4.57674	4.81526	6.88531
1.67318	6.12914	10.1127	4.80234	7.01691	5.01325	5.94115	8.15269
1.35203	3.49684	5.05304	5.41317	7.98656	7.02778	5.88227	8.094
2.27003	6.11988	9.62973	7.1696	5.16526	5.98388	8.6692	6.39645
1.90441	5.99779	4.87207	9.07142	8.40228	12.1871	8.12021	7.52531
1.3616	4.97834	5.81007	7.68842	4.90258	8.22754	6.78925	6.1639
4.71791	14.4615	5.43757	4.19052	7.11519	6.57189	4.93186	5.86769
1.49084	4.41686	16.5699	11.8598	5.22485	4.23569	8.46583	5.20529
2.02768	4.14162	5.85763	27.4424	6.44923	5.40766	6.32841	7.88421
1.41421	10.1686	4.46764	6.46348	5.75821	11.0168	6.52843	5.24744
1.86695	4.05359	5.54645	7.9618	8.4094	5.66511	11.0927	13.122
1.77864	9.59623	20.6943	6.02441	11.0132	7.02833	5.16102	5.40131
0.895935	3.82962	6.2835	12.3423	4.78072	8.97756	9.13473	5.65422
1.09075	39.7586	15.4973	5.2633	6.80837	6.85559	4.31501	12.2673
1.38194	5.63291	7.20158	5.57792	5.25597	5.84489	9.79177	5.27566
1.6026	5.56248	14.4694	8.01752	4.97093	12.3076	5.52243	5.52773
1.68079	7.26731	4.84521	20.2837	7.53774	5.05689	6.66122	5.76801
1.37729	4.78601	11.7306	4.76767	5.15977	8.52325	10.7803	5.71297
1.08284	5.8516	7.53229	13.4986	7.18739	5.81992	8.67452	7.08081
1.27818	6.86665	12.247	8.99457	6.82581	13.5902	9.13726	6.28386
2.67978	3.18474	6.70398	6.34954	7.44756	6.04474	9.52161	4.05975
1.78421	4.34094	9.39596	5.3893	5.99084	11.7608	6.12713	7.21711
6.62172	6.10382	47.9758	7.71568	9.3465	6.79612	5.54566	6.07606
0.731412	3.58372	4.45554	4.23492	4.8828	5.82666	7.33865	5.32978
2.34246	7.28354	6.50037	7.76625	4.82517	6.37118	8.5745	6.08545
1.33697	3.95725	6.54622	4.88365	7.96056	5.87358	4.54598	7.13382
2.00186	5.56223	8.82944	6.21079	8.81181	5.79194	7.73256	7.86012
30.8726	5.19376	5.43847	9.09128	11.5654	9.17167	16.0085	7.32738
1.68179	8.6363	6.287	4.96371	6.34026	4.71572	5.20598	17.1283
1.00948	4.55884	4.92506	10.6806	5.73869	7.44942	5.86795	5.41376
1.60741	4.54077	9.48036	5.1698	5.32171	10.4116	9.07889	4.85837
3.41762	7.07265	4.91015	7.53896	4.95762	5.94772	10.6688	8.91426
1.29134	7.14781	13.6231	9.94221	8.78239	6.00511	18.6491	6.45572
1.1105	4.40823	5.36469	7.46893	8.31914	6.77006	5.60223	6.82447
2.86935	3.4103	7.38358	4.9393	6.30186	5.46637	11.6624	5.73838
1.79502	5.60825	9.1348	6.37234	4.59425	5.43664	5.44099	6.38037
1.62884	7.3892	5.01643	4.72634	6.03045	7.5346	8.40846	5.11891
1.49133	4.44072	12.5731	6.95374	8.47274	5.51544	5.28321	6.04997
34.1091	24.6509	5.35669	6.70505	5.89463	6.87636	7.05203	8.72294
1.77542	19.4273	5.58969	5.07267	8.40616	5.90015	5.26467	6.42344
1.51627	4.62649	5.87537	5.03048	6.54891	7.21618	6.88068	6.03986
1.91935	5.28666	4.55497	5.65658	6.06634	4.67825	10.5738	6.66333
2.18283	7.42968	6.31308	4.30801	7.94323	14.7517	8.18132	5.99157
1.24319	5.66098	5.91596	4.80352	4.92493	4.51683	7.46379	6.5441
1.59687	5.98347	5.36709	4.90472	15.9102	6.64373	8.40803	10.6043
3.00231	6.66394	10.7123	5.00794	8.84334	4.41777	5.7581	5.5375
3.40686	5.5955	4.59187	12.526	7.23233	5.36827	6.75571	8.65342
1.90825	4.16939	7.9178	8.04949	10.4784	5.73096	6.17766	4.74904
1.03482	5.56008	4.44502	7.61103	11.0788	7.52001	5.78092	6.14673
1.82877	4.78706	9.0587	5.81301	6.26764	8.81645	5.14597	5.9595
2.61006	7.95568	6.4878	5.14005	8.85062	5.39159	7.77994	6.66473
2.50269	5.03382	8.00369	5.96391	5.64577	8.61672	6.16902	5.46129
16.3537	5.19713	4.42074	7.18438	5.53904	5.02303	7.09784	8.04716
3.30523	5.71199	7.40917	6.79006	8.29312	7.87337	7.46083	6.71723
1.75478	5.59644	6.05356	5.10681	6.87187	10.2708	7.32313	17.0043
1.29432	7.68541	6.98835	4.9788	10.1999	5.1783	5.62645	4.79503
3.04541	9.64179	11.7658	6.77511	5.46559	5.14305	5.15695	6.32029
3.25006	5.91987	11.0867	12.2251	5.6401	5.15255	5.22367	10.0808
1.2873	34.8419	5.83264	5.52623	4.97724	5.33655	11.9848	5.44082
2.18101	10.6437	5.52339	5.3351	6.41927	4.91269	4.33357	12.8683
1.31531	7.02121	4.88557	7.29108	5.24912	4.436	8.91782	6.94794
1.20029	7.6761	5.0113	5.81102	5.5156	5.72461	10.2695	7.23861
2.78482	9.70784	5.24892	7.98755	4.46831	5.46454	5.64751	6.06053
1.38801	8.74023	6.56257	10.1149	5.85797	6.07383	5.60531	8.33092
1.46893	7.75847	4.60706	8.14063	6.6126	6.14386	7.52441	4.85968
24.6892	6.16089	5.55135	5.97587	6.771	5.61941	5.23181	4.94244
1.43427	4.49352	7.83022	6.84568	5.33359	7.73404	7.43625	4.4816
1.10412	6.06021	5.0286	5.37336	7.06317	5.88034	5.29604	5.39982
1.36988	7.04208	5.77629	5.23447	4.58493	6.83475	8.53147	5.35483
1.13804	4.65265	4.68668	4.26445	9.80374	14.5819	5.47684	4.91881
1.41384	8.21331	10.6635	8.81823	5.07687	9.86568	4.98876	8.11661
6.59079	4.05061	4.92727	6.21012	8.3753	6.85073	6.9325	5.76028
2.31147	4.7351	5.36398	9.60254	5.28721	83.6781	5.0232	7.93786
2.26688	5.22047	5.57115	4.96447	11.4831	4.74963	5.00681	5.05795
1.65478	5.24074	5.22763	5.14303	9.08602	7.25478	6.59704	5.02963
1.23487	12.6652	5.31735	6.8362	6.73384	7.22646	6.30367	5.71371
3.25257	5.82768	7.50868	6.07903	7.74464	5.05018	6.44062	10.2266
2.07574	4.45901	5.50632	7.16082	4.45061	7.68094	5.08292	5.64565
1.61589	5.70276	6.11465	11.9009	6.47756	29.7287	5.40565	5.66416
1.63001	11.9482	5.58689	5.82872	10.4758	7.47235	15.6732	6.11499
2.07265	16.1899	7.81461	4.62391	7.7533	5.36022	5.30449	6.11476
0.98435	4.70279	10.437	5.11217	7.52359	7.91243	7.67499	6.7427
1.22504	3.53639	10.6549	9.8046	5.05667	6.00383	5.48768	5.06906
1.73244	5.95241	4.9571	7.02879	8.2213	5.15475	5.26564	6.0005
2.44995	4.18715	5.84852	27.2494	10.8876	4.65215	6.16117	5.36794
1.46312	3.76531	9.49727	5.71708	9.24478	5.56471	10.9953	5.52869
2.87845	6.75063	11.1432	4.88385	6.40899	11.3123	4.22859	6.76731
1.39423	3.65808	5.56908	5.45162	7.19807	7.26441	7.87999	5.6633
2.63441	7.08703	10.917	6.22585	4.87041	5.02256	4.43292	13.6346
1.27395	5.51933	10.728	5.26426	5.70194	5.30262	8.54734	6.26051
1.52636	6.35771	4.59024	5.19588	6.99851	4.96993	6.30051	5.38524
1.49131	7.05173	3.62896	6.89357	8.66354	5.66618	7.19539	6.03765
0.985585	10.5852	5.4973	5.15248	5.47881	7.56919	6.75557	7.12104
1.4941	4.12031	4.56526	4.63177	10.0877	5.61036	7.9686	10.3612
1.29747	4.16509	7.0976	5.26686	6.06649	6.81374	4.69056	9.97091
1.22801	4.58966	6.58685	6.77681	5.57087	6.03967	5.49401	4.91077
1.92072	5.78424	9.3088	4.62362	6.40461	6.55674	7.18896	14.0602
2.1234	4.39982	13.1063	5.96465	7.35776	7.07333	5.72535	7.52045
0.874761	5.5347	5.25253	7.21576	7.05567	6.63738	7.14876	8.32267
1.7946	3.81268	5.69888	8.43764	5.74107	9.61417	6.30766	6.97677
1.7817	6.33977	6.44715	6.54978	4.98214	5.89234	8.1123	4.61001
1.35747	7.05098	9.12114	6.68182	11.8687	7.36307	5.10941	6.39931
1.32221	3.60774	5.50745	5.26193	7.25727	6.85718	6.65501	6.4773
1.36911	3.86681	6.18464	4.80831	23.7052	4.28179	5.7783	8.03068
0.94329	4.66798	7.12114	4.57338	12.4968	7.82373	4.834	4.83257
1.50308	3.03027	6.6896	32.7006	7.54631	5.11543	14.2863	7.83101
1.0539	5.3937	5.80007	5.27072	7.41389	6.16916	6.54004	5.70075
0.796732	4.0174	6.01604	4.91778	15.9414	4.97287	11.1445	7.79111
1.69642	12.4855	12.6179	5.09587	5.96608	4.76653	5.83983	7.33993
1.72702	7.42075	8.35162	4.56216	6.15185	9.47088	8.95111	5.86799
0.933115	4.41054	6.34391	6.26762	8.94155	6.97444	5.1627	9.50081
2.23665	5.58525	5.09902	11.8619	5.52041	7.43188	5.97695	6.12354
1.2928	4.02896	7.28824	9.98094	5.40862	6.84686	3.94182	5.76067
7.08654	16.0037	5.61524	4.66097	6.09217	4.66845	11.0704	6.51809
1.67841	3.39777	6.79244	19.193	5.79644	6.82948	7.409	4.43602
1.24921	4.97387	8.16861	5.11801	13.7334	7.13445	4.58014	4.44375
1.18163	4.20471	6.66847	9.42405	5.57348	9.71814	5.18551	6.03793
0.863823	5.20034	5.29989	7.17666	7.56024	6.24375	4.59056	6.72366
0.950916	8.6311	7.75815	17.9438	8.64441	8.40754	11.0752	11.2808
3.76903	5.3833	4.46836	6.75766	8.99322	14.2815	5.63546	6.58292
1.14495	15.9119	7.08733	6.72768	5.34918	5.56724	5.12015	14.665
1.9397	4.40111	5.61663	5.95782	6.38811	8.24238	5.72789	4.50031
1.47056	6.51129	5.89967	7.74509	7.11422	7.31148	5.97771	5.49005
10.9166	6.23671	5.84416	8.77287	12.4678	7.15041	9.36438	4.63715
2.7932	6.82814	8.68891	5.78067	6.36969	6.5389	7.37846	7.56901
1.5905	4.75975	6.75571	5.69812	7.96694	4.55392	5.806	7.86085
1.80029	15.0796	5.14699	8.91278	4.72394	4.63216	5.72337	6.3246
1.62975	6.33213	8.15055	5.39941	10.652	6.48207	5.93498	5.64348
0.934927	4.0233	5.50462	5.25565	5.80786	6.74473	8.15903	5.23991
2.16761	9.0617	8.75415	6.16456	5.03068	6.53374	6.83774	5.8685
2.479	5.87726	6.485	9.24076	5.4849	4.17283	5.83159	6.92501
1.64241	8.33296	5.86699	4.8021	11.2573	6.46034	10.3125	6.29887
1.13545	4.51141	11.4431	4.80136	7.05001	5.87388	7.97316	4.78522
21.5629	6.05235	5.71239	6.6257	5.96396	5.79019	7.50775	6.91354
2.80075	3.88366	14.465	10.6601	7.8451	6.82714	5.79321	5.41878
1.26707	5.01998	5.36801	5.71382	18.5012	7.85156	11.4533	8.18363
2.84713	4.31707	13.9645	7.90037	5.01409	4.9021	5.52383	5.57132
1.08776	4.9238	6.02905	7.36442	5.06061	7.2407	5.36872	6.74472
7.92667	4.96577	6.66906	8.8708	17.7073	5.39081	11.8166	5.07372
15.2087	5.45579	6.50259	5.81594	7.62411	5.22997	77.2004	7.59538
0.957056	5.50607	4.41912	4.58163	6.26066	11.8651	5.53822	5.0597
1.1849	4.39036	5.47477	6.14885	5.4172	14.9491	4.55607	4.91498
0.872362	19.9355	6.43354	7.72701	12.766	11.2877	5.50242	10.8394
1.36031	4.55051	5.00034	4.71469	5.0872	4.53214	5.37756	12.4079
2.65463	9.2306	6.50361	5.22813	6.18994	7.94186	19.8153	6.45186
0.949686	3.22976	6.57657	7.18365	5.9749	5.56833	12.7852	7.87933
2.03363	5.18654	4.45268	5.16019	5.22222	6.49483	5.74967	6.33543
1.51046	5.88896	6.70594	6.45365	31.2192	5.73737	5.40685	4.46899
1.7295	8.48753	4.7765	5.92489	6.69362	5.24914	6.1503	6.44394
1.72758	10.8063	8.19613	6.58302	5.46578	8.1267	6.08101	4.48391
4.00315	4.33742	20.2879	6.2093	6.81733	6.69034	7.63315	6.59449
2.63454	3.4661	10.7067	6.10999	5.3453	4.97095	6.51664	8.90135
1.88811	4.15828	5.32598	8.66376	5.32149	8.10074	5.30601	4.1364
1.43486	6.4011	10.7368	5.15954	6.42488	12.014	7.96756	6.29378
1.81276	5.96042	8.92007	4.65847	9.09671	8.85293	8.65126	7.30273
2.65092	5.25994	7.17855	5.91321	6.04088	7.62515	6.45751	4.5851
2.59832	3.21003	6.19023	9.72451	10.6359	5.79554	5.7149	6.86691
4.06743	7.68203	8.28814	8.00366	7.06707	7.32781	10.9822	5.66785
2.45034	30.6307	10.067	5.59165	4.82349	6.38857	5.17191	29.3384
1.15792	4.08524	6.26428	9.21582	5.36266	4.4497	12.4901	16.7366
2.00249	4.01898	6.7344	9.85072	5.5034	5.03165	7.7135	5.19557
2.26813	6.48138	6.68223	6.66679	5.67239	5.38529	5.33061	10.7659
1.38137	5.43522	6.64773	5.90869	11.7671	7.65578	20.7955	9.10381
3.42454	5.08868	5.71174	4.99417	6.90984	10.4174	49.9793	7.40145
1.58239	4.10694	8.94432	7.02032	4.73142	5.42764	5.47897	11.9922
1.92838	6.54489	10.4384	6.7467	5.64322	9.3187	4.74521	6.31129
1.5935	3.56932	9.1002	10.6151	12.0093	5.22269	4.6787	8.26931
0.946997	20.9908	7.75266	4.57183	4.46496	7.46257	5.43509	6.63511
1.01927	4.23729	21.3575	7.4857	5.62669	9.79965	5.11935	8.21647
1.77608	4.21972	6.68562	12.1875	8.77468	5.51476	5.97438	14.1317
1.69146	5.90487	6.31389	11.0486	6.75275	5.36202	8.13405	4.86631
1.5378	18.1179	7.4815	5.96122	4.95553	4.50684	5.6771	5.00759
2.28269	5.27876	6.17497	11.4626	4.89178	9.79957	6.67017	5.89052
1.02469	5.80966	7.07486	6.33146	5.47359	4.4831	15.3836	5.25065
1.40255	4.18806	6.2218	6.37213	6.83737	14.179	13.4996	5.26633
1.24823	4.34781	4.95443	5.41643	5.74068	7.20957	12.3293	6.74618
2.45869	5.65728	7.59873	4.44455	7.67452	7.42199	5.52843	5.83455
1.13417	5.8557	5.95745	5.44997	5.69515	6.27424	4.7293	4.47703
1.79348	6.10182	7.97657	9.0349	5.59296	6.57835	14.764	4.71071
1.89929	5.54101	4.56323	6.45416	5.16191	5.52247	6.5309	6.34446
2.19589	3.31569	5.95829	7.11791	7.10165	9.34041	7.05161	7.73392
0.920127	8.44626	7.01492	7.73039	6.3936	5.17133	4.64294	8.84456
1.75593	23.2594	4.80701	5.60091	7.25582	6.43801	6.80914	11.4083
2.02397	3.89024	12.2465	22.3056	4.54649	5.80005	9.08534	5.75709
1.64371	4.57211	15.673	6.22476	5.34017	9.34438	10.7828	6.33156
1.96739	8.12708	5.34201	6.43109	7.08367	5.1414	5.27971	5.07729
1.52452	3.30759	8.49711	5.63426	5.65295	5.10321	6.0132	5.94138
1.4262	7.80193	7.78138	6.64132	5.79305	6.18209	6.50785	4.97996
1.65176	6.14075	6.1428	5.66282	7.08316	5.49334	4.26755	4.30981
1.58705	5.20176	5.69935	11.9512	5.68521	7.58042	10.4676	5.53705
1.74615	8.01169	5.09049	6.37656	24.7721	5.78764	7.82836	6.63274
2.69678	4.36357	5.52301	5.78862	5.66238	7.33352	7.76537	5.64058
1.41977	49.925	5.35713	6.36702	6.91066	9.64405	4.87802	4.61062
1.34561	7.24541	6.31621	5.91139	4.94425	7.09972	5.96868	4.56478
1.82216	8.56092	10.2432	5.82139	6.62779	9.06164	5.3277	7.55738
1.66138	5.24077	3.90002	8.54195	7.72367	5.61645	8.8084	9.72513
1.78921	7.97478	6.96282	6.67128	8.66429	5.68358	10.7778	5.83116
1.60957	5.06387	4.86775	6.83198	5.49553	6.36586	7.55034	5.98389
2.96199	4.21192	11.8683	6.36713	9.49038	6.77554	5.80624	5.24542
5.83643	7.21692	6.83529	7.87211	7.97383	14.12	10.3096	5.23273
1.52369	6.50623	6.4557	8.78313	5.46723	5.91638	4.96202	6.98356
24.1262	4.34541	4.96443	6.03525	6.5966	6.16853	10.6633	5.64534
1.73476	5.02597	5.1108	5.58413	5.90654	6.18124	10.7819	5.59004
2.00453	6.10827	5.34671	8.2615	6.75512	4.61499	7.86559	20.8248
0.905587	8.26472	6.34237	6.59521	6.58337	6.93052	6.22418	14.192
2.3198	3.94178	8.7389	5.99859	6.19578	5.38917	11.2022	5.97899
1.55218	4.80516	4.47363	9.9714	7.43573	6.10053	8.31682	6.0536
0.8058	3.54436	7.68147	6.57063	6.91572	5.3124	6.78595	6.2629
1.09131	3.77676	7.79429	5.80773	7.65927	4.34178	7.41007	7.44628
1.19546	7.31211	4.64715	4.76341	5.43844	7.19564	4.93064	6.42093
1.21135	5.19801	5.39564	8.68264	11.3417	5.13128	9.13963	5.41844
1.28823	5.25249	6.03001	20.8848	4.64235	9.68651	7.77984	5.47838
1.34573	4.07657	5.81541	7.50751	4.87621	7.51528	6.90679	5.32932
3.29512	6.20899	5.24383	4.95926	6.86515	5.38299	6.41839	8.53468
2.75837	4.09254	7.02107	13.4421	6.68237	4.53631	5.74365	4.88092
2.36508	4.92554	6.90032	12.5455	6.89695	6.4637	5.74757	6.11664
1.75945	7.37578	5.6739	5.76517	6.6832	11.2439	11.1777	4.64983
1.76846	5.59496	5.0874	6.50023	6.47954	6.09423	4.55878	5.57165
4.7037	10.1531	4.19455	6.74984	6.38656	4.70456	12.7342	5.68043
2.2828	6.75592	6.41889	7.57007	4.87782	7.55961	5.32912	5.13352
1.92857	6.04025	10.4484	9.30144	7.23692	6.08999	6.1043	6.05035
0.883807	5.81868	7.86101	11.5615	19.238	5.42894	7.36526	5.1279
1.39621	7.40601	5.92988	5.84767	13.0862	5.53467	9.32391	7.52362
2.70214	12.1177	19.1241	4.48582	5.11866	5.47809	5.37572	4.82044
1.2782	5.09437	5.46963	6.50798	6.4218	5.06948	5.98995	7.31295
2.89442	4.03957	5.53637	7.96096	6.4553	8.43468	7.53053	5.61363
2.32355	3.20837	6.42594	11.5526	5.21353	6.65572	4.9089	7.51806
1.26924	4.98084	5.25304	5.94306	8.76191	5.90295	4.37999	7.5066
1.6343	9.93725	8.6776	4.35617	24.0033	7.51375	5.9151	5.03014
1.32858	3.96549	5.11509	5.97012	7.52628	5.94157	8.92678	6.91493
1.69003	6.21287	6.30802	14.4079	5.05024	9.72538	6.04647	10.7994
3.30173	6.39572	5.17103	4.63509	8.92976	9.05701	4.57567	9.62206
1.46895	6.35918	11.5858	9.2882	6.08176	5.11687	4.18673	4.63851
4.59603	5.29584	5.00909	7.02566	5.15788	6.82583	6.70646	9.26963
1.51563	4.31353	9.02344	4.81869	5.15285	6.04165	5.84075	5.49637
1.54178	10.532	8.39204	6.15427	6.2692	6.90783	5.63247	6.1175
2.16344	8.00008	9.28784	5.6542	5.44119	6.06893	4.41432	6.27836
1.47933	4.18016	5.0699	4.95711	5.34586	6.89199	4.77054	7.00768
1.8394	4.15104	5.83519	6.04537	7.79226	6.93449	8.00156	6.75065
2.47106	5.85783	9.5101	6.07997	7.51678	4.74661	5.62751	4.92288
1.45469	5.81134	5.2345	8.04329	4.56949	5.82788	7.91562	11.2107
1.09914	4.6531	5.94137	12.0081	11.151	7.49262	6.73958	5.81928
1.34407	6.31117	17.6827	6.70056	6.09491	4.44548	4.62926	5.51114
4.74062	4.35992	6.76967	12.1808	8.56814	6.11815	6.53137	6.88634
1.63662	5.096	4.93921	7.66353	13.4382	8.24706	4.56061	6.6629
3.06632	5.43586	8.01299	5.54884	5.74769	8.74604	6.13762	6.13077
8.37197	6.75863	5.65616	4.99325	6.98073	6.39741	13.4687	4.94992
2.58079	13.2688	5.79081	5.47694	6.89019	9.8592	4.86835	18.4373
1.2734	11.2559	7.69903	8.42729	5.70297	6.25049	6.62944	7.93706
1.45509	5.96594	5.27207	5.50057	5.10923	8.79384	12.5741	7.69113
3.88385	4.42819	5.82199	7.32609	17.4056	7.60519	6.03127	12.999
4.07698	154.945	14.3192	6.21905	7.46366	6.83875	9.37003	5.37677
1.07723	5.41856	9.26501	13.0892	10.1949	5.70205	6.76217	7.8589
1.74919	9.55131	5.49802	5.61408	5.28497	4.88604	7.51478	5.19797
1.36362	10.8946	5.97618	12.0657	8.35395	17.7755	11.0966	6.01906
1.38452	8.24264	4.35075	5.67239	5.06876	9.89136	14.1595	6.69841
3.32201	3.56647	5.48496	9.52992	19.6739	5.35241	6.50729	8.27624
2.54352	4.95575	10.9582	5.28092	4.8572	5.62838	11.0462	5.9562
1.55495	6.59308	7.15393	6.47305	12.2415	22.4855	7.90511	6.84642
1.50181	9.27667	5.98769	5.04515	12.1143	8.01057	7.18974	6.42608
1.28001	27.8101	5.69779	6.2542	5.1697	9.49009	13.8375	6.76119
1.58672	4.86761	6.59633	5.35095	6.50449	6.86198	14.2509	6.09563
1.30052	5.37916	7.74573	12.9023	7.16116	11.6192	5.21417	7.63454
1.99746	3.79789	6.05393	6.9579	7.33464	4.71167	5.88415	7.00183
1.47533	7.22685	8.38644	5.38563	5.67524	5.19754	8.58739	7.48082
2.85666	7.90533	7.46861	5.54414	6.80782	5.58035	9.16628	6.81741
1.64621	9.76018	5.99313	5.74922	8.72053	4.83097	14.8068	10.2861
2.32723	3.99918	9.67211	4.55546	4.55709	18.6967	6.77954	5.21209
34.9522	7.37212	5.69376	5.62646	7.59545	6.92098	11.1068	10.8115
1.23712	5.07293	4.68204	6.11355	6.97126	25.2926	5.78474	7.97767
1.42694	10.3506	7.40505	5.76853	10.6061	5.16863	5.89375	9.35854
1.01004	10.6936	10.7096	5.42929	4.63355	7.50472	7.71568	6.24844
3.06787	4.36803	4.26106	6.26481	36.9458	14.6192	6.24653	12.2027
3.94648	4.69177	6.31092	5.31734	12.3903	4.80637	7.00951	5.35758
1.41646	5.08333	7.89097	6.84618	6.30955	5.12697	7.46627	7.71
1.40988	6.07777	15.5201	5.55492	6.45866	6.482	6.45194	5.66632
1.8481	10.2455	5.40811	6.56522	7.11916	5.86809	10.9537	12.4022
2.14714	5.90124	8.81528	6.82749	5.18658	9.22911	6.34296	8.35323
1.68221	10.1046	5.18024	4.3344	7.32002	4.81938	6.11039	5.22272
1.54703	4.12043	7.01048	5.0348	7.2801	5.07695	4.66191	5.36833
0.843494	5.02172	7.86616	4.40156	5.54454	7.88623	5.6509	7.06274
2.45404	13.2165	4.68051	11.2669	4.76849	8.09497	5.63719	10.2279
2.01016	7.59304	6.37755	6.08482	7.29881	7.04871	6.83004	18.5717
1.49758	7.00403	4.6761	6.9267	10.3972	8.58397	4.80512	9.23583
1.99746	5.68085	5.4483	4.07452	5.04756	7.34684	5.32813	12.5424
2.16879	8.03187	8.84617	5.97958	5.01129	5.26574	4.18622	20.4916
0.982967	4.89817	6.58401	4.50491	5.76539	8.35068	5.80013	6.80127
1.52039	6.8566	5.52825	8.83326	7.15367	5.79268	5.357	4.73994
0.910879	5.19563	6.6523	6.93607	6.66703	5.22699	6.31521	8.47332
1.04486	9.93588	4.77156	5.27325	6.13205	7.09348	6.65347	7.14833
1.93999	5.31544	5.99573	6.46997	26.5591	6.37209	7.67391	12.1446
1.76324	11.5658	4.70936	7.17581	6.67146	7.88577	5.14851	8.25477
5.55472	5.22682	16.7038	5.59826	6.75912	6.20041	6.99879	5.67091
1.69833	5.8599	5.53985	9.56032	8.59273	10.1916	5.04226	9.14329
1.74812	17.7706	5.03485	4.6092	8.60993	9.98928	5.65129	6.01535
1.94964	3.99363	5.70012	9.68981	5.18437	6.54843	7.16835	4.88994
1.52026	5.04455	6.47595	6.60468	9.50543	6.8371	5.09391	4.78483
1.46443	3.72116	7.17346	4.8848	5.03586	12.2793	5.99875	6.05813
1.6391	5.62337	6.37396	5.74213	7.77435	4.58219	11.3067	5.56645
2.39958	6.80857	6.0794	7.51157	5.30927	4.43373	5.71559	5.15254
1.49788	9.51538	4.66029	5.66712	7.46932	5.8708	8.34767	8.7466
1.32662	7.50889	7.86387	5.77349	6.34344	8.38187	6.27805	6.42169
1.96181	5.19993	5.54628	6.73364	8.32279	11.238	6.4696	10.9093
2.59753	8.79406	5.36909	6.30279	10.0438	7.06181	5.55649	7.6278
10.32	9.41013	11.2765	8.38108	7.41175	5.19194	8.58744	6.35804
2.74889	23.6505	7.47693	7.18948	6.16959	6.29045	6.26548	9.74339
2.80169	4.69177	5.11131	7.39398	5.92724	7.26483	15.3509	4.91141
2.26276	4.03882	16.3576	5.61624	6.93892	5.25086	5.29932	5.84108
1.82948	9.65773	5.08654	8.008	6.34341	5.43041	7.4932	5.98107
63.1301	4.31749	5.34589	4.76911	7.57696	16.3706	4.63689	5.11244
0.94508	4.07548	6.11804	5.69737	7.66034	13.1357	9.61986	8.79788
3.92556	3.28369	6.26867	7.18319	6.89182	7.01204	5.63593	8.14279
0.863553	5.08156	6.41202	8.425	6.43746	5.919	7.83549	9.46093
0.919128	3.7268	8.32742	5.48692	5.94293	6.55349	10.212	5.73474
1.96221	4.89861	5.5571	5.85305	4.36948	5.82976	19.3798	5.24985
1.32163	5.30475	6.9064	7.46103	10.4172	11.007	5.61209	8.93597
1.84083	4.78405	17.1792	5.50541	6.03701	5.78789	6.84637	4.89821
1.14068	5.68609	6.9149	5.81777	6.90908	8.18549	10.8734	5.49145
0.881968	5.15081	6.21159	6.26146	7.49475	6.91374	6.69336	19.7174
1.58147	4.15805	6.42704	7.70081	7.78473	5.00792	5.81001	6.72637
1.63819	3.94975	9.31182	8.7247	8.00612	5.3142	7.34381	6.29806
1.69271	10.7523	3.75656	9.34763	5.4838	5.70926	5.25731	11.8825
2.24256	5.19426	5.59877	7.6019	5.98241	10.8367	7.31227	8.63838
1.32855	4.37208	9.3418	5.97845	4.90209	6.59748	7.16901	8.17732
0.790601	6.01699	7.13419	5.71005	4.99042	9.85027	6.06623	4.81775
3.20235	3.94316	7.64489	8.92331	5.46573	7.61108	11.0175	4.41786
1.97118	10.9087	8.04893	4.78107	8.34581	4.9619	3.97385	6.09764
1.73979	4.02315	7.7444	7.12622	5.13414	6.21166	6.18077	5.67135
0.926037	4.76122	8.7692	4.89189	7.77786	5.75219	7.07068	5.03779
2.47756	3.63184	19.9958	9.96695	5.18698	8.10174	6.78677	9.49254
6.6015	16.8663	6.11336	8.22676	11.1026	5.48003	6.21479	6.19739
1.14492	3.72076	12.6118	5.18818	10.6037	6.78248	5.0256	5.75851
4.35216	17.716	6.72558	4.67886	8.29371	4.58935	7.54929	7.08787
1.29548	8.0598	6.86095	12.6495	7.64588	5.94763	10.629	6.33623
1.55196	10.4292	5.38979	5.71226	4.37607	8.82731	13.2785	4.38467
1.8111	4.61932	5.22806	5.65733	6.7045	8.90321	6.53803	6.25659
1.8937	8.70817	5.67398	7.95467	5.63742	10.9089	5.0254	6.69606
4.5341	5.84488	5.93255	7.25671	11.4331	5.50314	6.41505	6.47877
2.40909	6.60163	6.60674	6.70485	6.78079	6.63024	5.42979	5.61875
1.21883	4.56646	4.67444	8.17909	6.36512	7.43489	9.03961	4.79344
1.69032	5.02795	6.01602	7.502	5.24892	8.15653	7.25429	7.08258
2.25869	5.2277	7.9083	6.98346	7.25214	6.04502	6.73035	7.26615
1.73132	9.2784	5.30758	7.16701	6.32529	8.84204	5.35299	7.54535
1.4963	5.12344	5.68762	10.6921	5.8137	6.91673	17.3039	7.12171
1.79061	7.14169	6.87414	6.93585	5.85955	6.35607	8.48311	6.57954
2.26365	5.59814	7.88543	6.86639	22.7227	6.16111	6.28258	7.13841
1.05555	9.12766	8.70717	9.91226	5.2994	5.63989	7.13081	6.31956
1.00823	3.66766	7.9788	10.5313	4.83132	6.3275	9.31475	8.87161
2.728	7.171	5.03233	5.36677	8.41234	5.29538	6.2221	8.39903
1.51018	12.1099	7.50394	5.87566	7.65228	5.39756	5.04392	6.10978
0.909345	20.6686	6.14129	4.7975	10.6865	7.91464	6.36404	5.96717
1.5203	5.27631	6.3211	5.76245	12.8415	10.0159	4.40859	7.27308
3.04374	7.26139	5.42628	6.87943	5.66067	7.20443	7.80571	6.37345
1.18494	7.45153	4.62228	4.60768	7.80902	7.40293	6.61301	6.1066
3.90811	3.80438	12.9296	5.32392	6.20795	6.48467	4.92688	6.13051
2.07596	10.9909	8.27777	4.39713	10.8323	4.55985	6.56194	5.51136
2.05513	7.4435	5.16208	10.0291	5.41867	6.41525	7.78724	7.2172
0.729156	5.60501	4.68842	7.73561	6.63092	5.14256	5.73969	5.75116
1.676	4.35966	7.65505	6.87879	7.47013	9.96378	11.0642	5.52802
0.992736	9.37744	5.88132	10.8876	5.41025	5.84364	4.74071	7.55118
7.11979	3.37476	6.50628	6.25651	8.7957	11.8286	8.16884	5.73303
1.32854	3.30189	6.18968	6.47575	4.80252	5.65544	7.05863	6.48434
2.08723	3.67644	6.8256	5.74612	5.51616	6.35586	5.28921	7.5891
0.823279	7.95836	5.55823	8.05977	20.6345	6.59027	11.1106	7.16499
0.720166	3.2318	5.8295	7.75401	7.39895	7.00775	8.66535	4.69191
1.51847	13.8044	6.84252	5.0015	5.00358	6.58127	7.65933	11.3451
1.40157	5.7095	5.87112	6.01007	5.01816	6.42546	7.37017	10.7259
2.20473	5.76258	4.51334	5.19404	6.78227	6.9283	14.5037	8.9003
0.824587	4.4216	10.1449	4.93721	5.07295	6.40968	5.48005	4.70041
2.08778	6.08258	8.14706	6.82279	6.24932	9.07605	5.02148	6.5141
1.90848	5.04598	6.37299	6.06877	5.91229	6.54436	8.14317	4.32633
0.889768	11.9407	5.35187	6.68497	6.98918	5.3538	4.74004	7.78102
1.68751	13.0466	5.50144	5.85226	7.15763	7.78087	26.3985	8.20982
1.67466	9.02496	5.76952	5.00839	5.09004	7.62754	12.2018	4.75096
1.03731	6.3827	7.17435	7.21282	4.95183	6.5828	6.57868	4.99487
1.62176	6.17984	6.15814	10.9498	5.66242	13.0667	6.07829	8.7209
1.24192	5.93505	6.90302	7.33437	7.75586	6.74512	7.26069	7.42436
3.60866	9.95893	9.74685	5.62749	6.52805	5.6025	6.77684	7.5345
1.19405	4.7846	8.15318	6.33875	7.83517	5.30728	9.78774	8.33533
1.03033	4.85787	6.83056	32.1159	10.8552	7.88425	8.07235	6.07642
2.21543	12.6615	11.5271	6.61498	4.50258	8.57327	6.39719	6.23327
2.11812	4.81031	7.84577	9.13866	7.59868	5.09777	12.9751	21.8937
1.34562	4.55529	9.02843	5.87481	6.726	5.10091	4.50955	8.9893
1.22166	6.82106	9.53056	8.1536	5.49458	6.50107	6.71204	5.60503
1.2846	8.87686	7.95846	6.59532	8.10043	6.27341	5.11968	5.88461
1.57227	11.1972	5.8611	6.04618	5.80731	9.15334	4.64712	5.77145
0.957818	5.74193	5.81368	8.71174	6.28885	10.9821	9.1054	5.58047
1.29885	4.39506	5.72997	8.79575	6.32862	4.99039	8.87148	8.68869
3.13829	26.2252	5.18069	7.48927	15.1374	10.2664	11.7712	5.06585
1.68506	10.8236	17.386	5.72396	7.44014	4.41281	9.30987	14.8446
1.83626	5.00016	5.57422	5.32808	8.0804	5.68353	10.8374	5.56771
1.98088	10.0046	6.574	11.6584	4.47853	13.4014	6.27109	7.79757
1.37716	11.7347	5.12227	9.60781	6.56921	5.46583	5.03948	7.24647
1.08113	4.69869	5.81109	4.32196	5.14241	5.82853	4.99492	6.21718
1.25437	4.3019	5.30424	8.56424	5.69029	6.64908	4.93621	5.76242
2.32342	6.80805	6.66303	10.394	6.56841	6.24431	5.51041	6.8215
2.16253	4.67378	6.69248	4.93462	4.24751	4.51247	5.2177	8.30737
1.69657	3.92242	7.18194	7.2005	5.47211	7.20859	5.69195	9.01905
5.05758	5.88291	5.53193	6.19178	4.28587	5.66995	9.32846	5.30131
1.1533	39.1802	5.18448	4.56344	11.9137	5.56143	5.98263	5.08238
7.1693	5.49299	16.009	6.13991	5.62435	5.04611	5.97451	6.10668
1.48698	5.73786	5.25076	5.42502	9.15364	6.99809	13.7268	8.55118
0.946183	5.92411	4.6766	6.23254	4.80672	4.83004	22.1397	7.09047
37.6147	8.75092	8.03686	6.70859	20.7263	8.51851	8.58943	7.42935
1.5796	4.13699	5.50286	9.08685	6.45643	4.25285	5.88431	4.65143
43.5723	4.91564	5.89857	7.40116	6.30893	6.08137	8.65549	7.80849
0.976693	5.62921	6.55588	6.00407	6.09978	8.40005	5.53358	7.79523
1.15141	5.69165	5.46042	6.74161	5.43038	5.04319	6.28296	5.78081
3.33563	8.35381	6.44537	4.28487	4.5671	5.87845	13.7939	5.96952
1.24871	4.21191	6.95385	6.69315	4.85455	4.82765	11.5997	4.67721
2.86844	5.47243	5.67525	5.95582	5.86037	6.21809	12.3394	8.53391
1.64868	8.38158	5.11611	7.67398	5.76769	5.93319	11.6701	7.28016
1.79997	3.56029	14.3462	5.96009	6.40278	8.45348	7.48098	5.49806
1.12183	4.3465	5.30497	5.07839	6.201	5.26201	13.3077	7.03367
1.97846	4.04522	5.0061	31.4467	7.36448	4.80318	5.28528	6.69866
2.12362	6.18629	6.50111	7.76836	5.93955	5.86536	6.83732	8.48053
2.57555	9.36256	6.13609	4.71776	4.36207	6.02417	5.26947	25.8947
1.42926	4.44077	5.45347	5.56831	16.979	6.09856	8.61137	6.3998
1.71108	241.281	8.94912	5.65012	6.24166	4.88513	6.10066	5.88727
1.09038	7.59593	7.88233	9.82685	5.85166	6.16624	4.56402	5.94384
1.25176	4.99609	6.14758	6.84265	5.20259	7.03143	17.4487	6.11533
2.73001	7.37439	4.92972	7.35212	7.51137	5.73219	5.77108	5.19957
2.59365	6.92304	8.5334	6.43921	5.60201	5.20524	11.4336	4.95527
1.93916	4.7323	4.42356	7.51224	5.20841	6.21534	5.0884	9.93351
0.983213	4.61702	5.21876	5.80259	6.54229	4.61578	8.57535	6.49686
3.30576	5.72108	5.47206	4.6973	6.17297	4.36837	6.29762	6.13525
1.0881	3.85133	6.7499	9.09829	14.7502	4.89382	7.89604	8.50364
1.37053	7.53502	10.1875	5.08723	6.23652	14.9261	6.23143	7.38854
2.02427	3.91418	8.68445	6.97689	5.36335	6.20661	7.32149	6.83705
1.08756	6.10913	7.99843	5.39716	6.35919	5.90909	10.9364	5.97881
2.7442	3.98757	4.6052	10.6227	8.3541	5.40568	8.17786	13.3122
2.60781	12.5366	8.4077	4.5618	6.2018	6.8608	6.76119	5.14288
10.7834	5.3524	4.74072	5.17423	6.86606	6.57281	5.22909	6.36739
4.52426	3.94019	5.42533	5.71376	5.86384	5.13748	4.85513	5.25393
1.6297	4.19106	6.12061	5.57174	6.13532	5.55242	5.32292	5.84684
1.5066	4.30433	4.88783	6.98302	7.42005	4.92808	5.81054	4.95433
2.02371	14.9329	7.85032	10.5536	5.17207	5.85355	10.4037	6.76367
2.43965	4.92268	6.32151	5.50132	6.64662	8.73458	8.90565	5.1612
1.45497	2.97344	6.47551	7.09506	9.78126	7.54875	5.6995	6.26397
1.70429	13.9476	9.21222	5.74788	6.88911	6.53034	5.80764	5.81542
1.9005	5.19623	4.99454	5.16455	8.25851	26.1627	12.1917	5.40276
2.5299	3.94753	6.39209	7.35336	5.25137	6.89021	6.07915	14.8352
1.36444	5.96452	6.33745	13.6074	4.75823	4.88421	5.62812	17.386
2.1643	4.73063	6.42057	4.89938	7.06118	6.08396	6.44278	6.47641
3.38619	4.39876	5.03738	9.92801	8.56497	4.80636	4.82175	14.5929
1.19683	6.22846	5.91211	4.86024	4.46504	4.31912	5.52869	16.7091
1.07126	10.8514	12.9032	5.12143	4.79777	6.24517	8.54268	6.92838
1.6951	5.12842	6.48332	5.25129	4.20989	9.58487	6.232	6.83082
1.35911	5.19465	4.33843	8.32652	5.96033	5.52097	6.2897	4.85135
1.47986	7.29326	15.7033	5.35932	15.8567	4.73348	13.6119	5.17947
1.68311	4.89177	5.18198	8.1792	4.69363	6.38099	5.4544	4.83461
1.13249	4.64823	7.24709	17.3298	6.55517	5.47677	9.35418	7.88188
2.80049	6.96468	8.97965	53.1658	7.95995	6.38529	5.31808	9.62642
1.77461	6.18597	5.75139	7.61279	6.36637	8.33399	7.32907	8.7269
1.86047	3.68828	5.67668	5.2805	4.48533	6.22506	7.45795	4.7574
2.85705	4.73984	6.73883	7.57355	5.14952	5.29549	6.29812	5.89602
1.92476	17.0462	8.88274	9.82911	5.74273	5.16544	14.3899	5.91203
1.23994	3.82319	7.20783	5.62602	5.03939	5.63301	5.24507	6.07401
1.0382	4.13465	4.68705	5.02116	7.39401	5.05217	6.9332	5.17766
3.03305	4.97641	6.17817	7.39463	8.41422	8.20121	6.65444	4.76222
1.52275	3.71082	4.95352	4.5303	5.02065	13.488	7.17752	10.3445
6.91347	4.63148	4.57522	9.78425	8.83564	10.1532	4.83266	5.29102
1.56426	8.47844	8.2923	7.81975	6.88114	11.434	6.51624	5.40188
2.68072	3.63264	5.12113	12.59	6.79842	5.45135	5.44389	5.98419
1.01067	8.36974	5.07506	6.7931	4.98847	28.437	6.75024	30.0817
0.796189	14.2952	6.07405	5.07241	5.28681	4.76714	5.26128	7.31704
2.46855	3.69407	5.66414	7.63016	6.46392	8.03901	10.5177	5.73867
2.85968	3.53395	6.23091	5.93763	5.70936	6.36662	6.01337	4.61915
3.31579	12.0437	3.95738	4.82263	5.37965	5.83325	23.1343	5.52836
1.68856	6.75597	7.14218	7.85691	15.1468	6.90578	5.96165	5.35636
1.23926	5.59693	17.9246	4.51006	9.91103	11.7818	6.67038	6.21068
1.70125	22.6969	8.08397	6.69821	6.67665	4.43076	5.71574	4.81495
1.57104	5.5323	3.85577	4.19097	8.18719	7.37824	8.73448	8.83083
2.6617	3.52569	5.56176	9.95281	5.60237	5.84061	13.1112	4.77136
3.2815	6.71111	6.8935	7.19538	5.14396	7.23621	4.29599	4.89779
2.15995	6.41463	8.42276	7.20717	6.97867	6.70231	9.29871	7.62557
1.49857	4.12067	5.94885	7.34757	11.3866	6.64436	5.54914	12.6965
1.24673	8.33551	12.1696	5.4689	5.96332	9.36517	6.35422	4.79444
1.27097	3.90491	23.579	5.58225	11.3263	5.32395	8.20527	5.01419
1.59947	10.7793	7.18275	4.99427	5.68673	18.5494	7.42261	5.05473
2.4757	5.29122	5.11718	5.80513	8.42294	9.35936	4.9227	7.73873
1.48095	6.23325	6.61738	5.26998	7.15811	8.3883	7.03495	7.45399
1.71587	8.9094	4.96923	5.67093	18.4939	6.11226	5.44274	10.9206
1.52984	4.96482	7.9627	5.51967	5.07847	10.628	6.92323	4.58495
1.03934	5.05748	7.02349	7.45728	5.46311	5.3442	9.38277	6.71845
1.16533	5.4965	14.0645	6.19981	11.6919	6.97711	7.25734	6.5803
0.600546	59.0538	5.05297	7.83065	5.12904	7.13557	5.14313	7.29685
2.88453	5.18442	6.18182	5.81553	5.00707	11.0752	5.47002	34.0857
1.32526	4.22478	6.38547	7.28935	7.50906	5.64648	7.31333	6.01017
2.65014	5.25187	5.371	5.56632	11.8829	5.08356	5.29997	5.25783
2.01621	4.36676	8.56058	6.9232	5.69526	4.94361	6.05514	4.85513
1.27076	4.16102	5.57749	4.58076	5.14645	5.53966	6.14778	4.88564
0.906232	4.34896	4.37637	4.9535	5.93294	5.2424	8.14504	4.67724
1.39536	4.47675	7.35643	7.24536	5.10664	9.02658	7.41755	4.80153
1.54177	5.85021	4.54804	6.19288	8.67415	8.76676	5.50975	4.61739
1.56088	7.40097	7.30325	8.77073	6.18068	5.37326	6.97786	6.85888
2.17759	6.02265	7.87322	5.62423	5.79591	7.42996	7.7576	4.34756
4.09032	5.59387	4.66012	4.00208	10.1633	10.1882	5.29457	7.60573
1.38487	32.2122	5.30621	5.9231	6.53944	5.62025	5.96107	5.16622
1.8129	19.951	5.89378	6.39296	8.56685	13.5632	6.48003	6.5496
0.911831	4.40044	13.0281	13.6975	4.05156	14.9238	7.29779	5.85889
2.43588	5.14091	15.4207	7.24241	6.36785	4.46219	5.02997	6.36606
1.34438	6.83077	5.47483	5.89644	5.64401	9.10519	6.93764	5.25872
2.25692	5.0428	6.57537	4.68446	7.17471	14.1763	4.60384	6.87161
1.0978	22.2514	4.85476	4.92228	6.30514	5.75066	5.22588	5.54719
1.32028	10.4024	5.1515	5.23776	11.6445	11.5736	5.28181	4.6979
1.74732	3.10974	5.7123	7.81975	5.62543	4.83048	5.98702	6.41702
1.74715	6.40639	7.5942	6.46453	8.14753	10.4079	5.25514	5.62539
1.53721	5.01621	5.06968	13.2672	6.63848	4.39388	7.16854	5.66311
1.29723	5.81486	12.3231	7.31027	7.03375	7.00951	11.3257	6.60553
1.19027	6.7157	4.0679	6.96806	5.43168	6.71361	9.23994	6.50172
2.66529	4.70096	7.96548	5.67773	7.60684	8.38262	10.2853	7.04829
3.38192	7.49548	9.353	5.80288	8.40222	4.90076	6.31048	5.7414
2.39022	322.423	14.3087	11.8923	5.43055	7.05667	8.21534	6.05125
1.39074	4.15968	6.67884	4.40657	9.57191	16.2118	8.69619	7.06361
3.07082	6.49161	16.0845	5.84183	6.83814	4.61527	5.23625	5.22256
0.985105	8.08736	19.4714	10.5567	4.45983	4.83769	6.35463	7.5948
1.19873	5.88669	6.72884	6.25713	11.5141	10.416	6.36971	5.37628
0.90245	9.99937	6.63899	5.23054	5.99022	7.79173	8.17123	7.97953
2.25389	8.08845	4.27234	5.36635	6.41553	8.10486	6.54137	7.96303
18.4109	9.45917	14.0152	6.54933	6.63256	8.73343	5.43017	5.81079
1.33854	6.42772	5.12761	5.18689	5.5624	5.95923	4.88589	6.34725
2.04059	4.24187	5.64303	5.99891	6.89311	6.86558	20.9527	4.13209
1.06151	6.83882	5.70126	6.05708	5.04991	7.76645	15.4159	13.9063
1.49259	4.92707	4.95447	5.52265	4.71235	5.25285	6.3589	8.68444
1.26813	6.50008	8.59271	6.41006	6.87875	5.37811	8.30435	7.54663
3.99678	6.13889	5.01679	7.0877	4.92197	9.70112	7.42753	6.27854
1.47451	4.14763	8.3377	6.54265	5.56393	4.73139	6.46503	6.93536
1.40156	4.43094	13.9047	5.47044	7.37384	4.66595	4.0816	6.26566
1.6925	8.89525	5.18345	5.64746	9.41546	6.85084	7.07974	5.26105
1.38255	11.2064	5.3531	10.4576	5.63295	9.30679	4.84389	6.39811
5.41457	10.4417	6.86453	4.73638	6.05361	5.48105	4.69938	8.86182
1.80393	3.17465	4.88191	4.53248	4.78235	13.7187	13.4683	5.50016
2.7928	10.5646	10.7015	4.79288	5.79387	6.85228	4.80763	6.39884
1.23416	4.01431	9.49205	7.25081	5.15727	5.99418	13.8733	8.99639
1.01135	3.97324	4.79735	4.61057	7.07502	4.7396	6.89642	6.45979
1.75776	6.73241	4.61154	5.12706	5.75723	5.72902	5.04088	6.92536
2.13213	5.51918	5.179	10.2419	7.88915	17.9568	4.63042	8.4307
5.40274	8.75306	4.8516	4.46062	6.42417	8.35173	7.8803	5.76
1.69489	5.34352	7.51462	4.56945	5.29533	5.12082	7.26851	9.30523
1.66039	6.92206	8.61004	4.77619	8.71477	6.13876	9.2946	6.61141
1.05952	3.77501	9.60603	9.05916	6.5259	6.74514	5.55363	7.25951
1.64054	4.77703	4.84393	12.9378	8.37305	7.13378	9.62403	8.43524
1.34566	6.55099	6.05972	6.81453	10.5737	7.14584	6.84203	6.15167
1.67052	3.16261	6.40675	5.36954	8.63285	6.17412	5.92778	5.0385
1.3918	8.4976	6.08693	5.97592	12.3419	7.17179	7.20998	8.58422
1.87508	4.73459	5.62682	13.7737	6.16826	5.11309	10.8611	4.74015
1.46231	3.75019	7.30849	7.01476	5.8497	7.30773	4.55054	7.63582
1.29236	16.0096	4.53773	9.99456	9.53838	7.64421	15.7714	10.0406
1.38954	7.02919	7.32165	5.21809	5.55649	7.02714	5.94193	5.36497
1.73216	4.42296	4.65797	6.39632	8.07991	5.78846	6.42836	4.48615
1.00045	4.09464	5.86792	4.8398	6.16153	9.68893	5.00402	8.68012
1.66501	4.57377	5.63628	12.1332	7.45069	6.15285	6.4847	6.40887
2.28566	3.77883	4.89051	6.45682	7.33203	5.17068	6.18783	7.22189
2.25834	3.66437	5.79014	4.4568	7.32094	5.11086	5.26835	7.63351
3.28992	6.30251	10.7929	5.60577	8.07827	11.5068	5.68096	5.71062
1.61018	3.70934	4.88406	14.7463	5.44317	5.63191	6.5635	5.0029
0.955702	5.27248	7.45692	7.5385	16.6379	4.54408	6.44078	5.41003
1.54527	4.87805	6.14947	7.67501	6.73986	9.24238	6.96323	6.53569
2.86753	25.2421	8.888	7.11306	17.1523	8.31089	12.5823	11.5073
1.67731	7.46667	12.3267	13.2529	7.78834	9.48619	9.55953	5.34238
1.69178	7.01461	5.71486	7.79008	4.92657	5.3182	6.07273	5.62613
1.18772	8.08976	7.60543	9.43635	17.0274	5.80187	4.9749	7.84468
1.31313	6.39101	5.60078	6.31609	8.45352	5.45486	4.43324	4.3418
1.00502	8.57882	6.20231	5.10719	4.88791	5.58775	12.264	5.99597
2.26601	5.46552	8.77679	5.61606	9.47461	6.69141	5.09242	5.00986
1.12536	9.64836	6.24913	10.6558	6.20274	5.69754	4.86623	9.58772
1.08518	2.94753	7.22114	8.44972	6.782	6.88041	4.77527	5.76788
1.16442	3.94876	6.11923	13.8236	8.70883	11.5525	5.74816	14.0305
4.64605	6.53309	5.37679	5.96891	5.05698	7.6906	5.05317	6.43585
1.13705	3.89153	5.50798	7.39401	6.1795	8.22959	6.26442	5.40929
1.54368	8.29549	6.04763	28.4971	6.49641	6.38182	6.44461	4.54648
1.62176	6.07404	25.4495	6.1526	9.88253	9.1477	8.78296	5.15311
1.18752	6.11172	8.37085	5.11319	8.03585	8.31074	7.78952	5.32347
3.81747	6.33921	9.19523	9.85245	5.73899	7.27851	5.4835	4.94299
1.62395	8.60042	7.83357	6.88385	4.20579	5.93176	4.75609	13.3919
1.90074	3.9061	4.90058	7.04238	5.41371	6.44889	4.3403	15.8638
2.60576	5.61244	5.60595	8.39318	5.58821	5.21884	5.70961	6.85683
1.46471	6.85521	6.8047	6.864	8.15497	10.7101	5.08678	12.3844
2.05386	3.56682	5.28086	5.40663	7.58333	5.34381	7.93925	5.36914
2.18673	5.32936	7.81966	4.62375	5.86584	7.78985	6.09883	7.06308
1.56135	6.65954	5.41109	5.63955	8.36443	7.20242	7.01347	4.93338
1.79719	4.03036	6.07549	6.15614	9.40753	34.2873	7.61937	5.03509
10.7397	4.70309	9.92542	5.23874	6.37953	3.94653	4.75771	9.04857
2.02909	7.55142	9.36472	5.43336	6.33198	5.33734	6.06188	8.76255
2.21909	7.13265	5.80157	6.11501	6.99498	32.6655	6.61837	7.31353
3.45467	4.20147	5.76607	4.88367	5.32517	6.49191	5.65644	13.3537
1.42355	5.01106	5.40127	5.72482	5.75073	5.5477	11.753	7.94485
1.34386	6.03229	6.35845	4.86954	4.49001	9.29896	8.88902	8.09928
1.99759	8.72436	12.1158	5.96594	5.92839	7.58472	7.99785	4.41319
5.48309	7.86104	6.78272	5.49274	6.58592	8.7655	9.98503	10.3933
1.54199	4.93938	4.79664	4.7978	5.82208	5.40397	6.74789	6.22106
2.2016	5.78279	5.54896	5.69401	5.6732	5.91554	9.09521	5.39715
4.27825	3.35797	6.63789	8.69739	5.44205	5.29436	5.7832	6.18178
2.22174	5.03612	9.73968	7.22735	6.17449	6.49937	8.50186	6.00216
2.12067	28.868	4.68549	11.8243	5.49241	5.71044	7.09635	7.77638
1.56778	7.15779	4.69279	8.41374	10.6686	8.00769	7.42361	6.47423
1.90719	5.02517	8.81801	6.60806	5.27631	6.9011	4.41273	5.8631
1.60869	3.18954	4.93468	4.4812	6.04051	8.72245	8.44412	5.53973
1.97063	4.43948	6.43063	12.3494	7.99092	6.13723	6.9371	6.70741
1.88069	6.4469	7.47408	4.68044	6.53466	9.18861	4.30841	8.86118
0.977137	5.05132	7.66876	12.3311	6.24599	11.8835	10.083	20.2571
3.98444	4.59718	11.167	5.84169	10.6326	6.31078	8.18706	11.2706
5.16114	3.65561	5.95059	5.25498	11.6818	7.07112	8.39509	6.05267
1.61675	4.80759	4.83249	9.13414	17.9127	10.0613	6.00786	11.2774
2.72025	20.3182	5.3316	5.07423	7.77375	12.1689	7.9414	7.089
2.91144	4.32233	6.46743	5.98906	7.31745	7.45945	7.7434	11.1882
0.984032	3.62947	11.3148	8.9635	5.24395	9.03403	5.35865	9.8549
2.73624	3.96063	4.7474	6.63714	5.15487	5.98155	6.29722	4.90367
2.85026	4.70757	4.5387	7.19744	6.61018	4.93247	6.03131	5.00219
1.44414	9.04765	6.4838	5.0019	6.47899	6.07774	7.20654	5.03708
1.94717	4.31615	9.83245	11.0369	10.7092	6.70217	6.12963	19.9448
2.4047	4.8317	6.33145	5.40102	6.09586	8.21431	7.10643	7.09234
4.33193	5.36164	6.32223	5.20275	4.49781	4.85773	8.62433	4.94296
0.884651	6.22402	9.93014	4.65838	9.40712	16.3064	11.4569	7.10608
1.2862	5.85047	10.1909	6.37967	5.54971	7.21771	6.34094	5.14591
1.22565	5.29713	7.68957	6.45663	9.36166	7.86086	8.28078	6.59508
1.33127	8.06231	6.15256	7.10304	6.01023	6.15682	4.3408	7.26039
1.72282	5.12859	15.1876	4.59748	6.66346	8.76916	9.80487	11.6875
2.00582	4.37929	5.52165	8.97825	7.6642	7.4168	4.70437	13.065
1.47221	6.44574	5.60287	8.77712	4.7528	5.55882	7.36935	9.61726
2.805	4.3345	7.43719	6.88171	5.12964	6.02208	8.0946	7.95367
1.50147	4.46423	5.28812	19.0462	6.297	5.75451	6.68702	4.92525
1.9887	4.56419	6.68259	6.27016	5.67114	5.48284	29.4971	5.70462
1.32994	5.25367	4.88465	6.62879	7.84284	4.94419	12.6243	6.28568
2.00015	6.54149	5.79808	5.28674	7.98494	6.67832	10.1244	6.77282
2.83608	32.4722	4.62281	5.45922	5.52218	7.19145	6.91387	6.40847
2.44779	6.38149	5.68571	4.33142	5.47055	6.2001	6.76967	6.02519
1.48381	5.63559	18.4198	10.8602	5.63942	16.1888	11.2061	5.88096
2.21477	6.44118	5.52494	10.6126	6.72869	6.74688	7.81946	6.2462
1.51074	8.42191	5.86663	11.9068	10.5487	5.72542	9.36859	5.45309
2.02466	5.90574	5.8586	9.67401	14.6677	6.01633	7.7999	7.27854
1.02465	9.17336	8.32666	6.07552	4.86033	4.6421	5.24156	7.74361
1.27006	7.59641	8.60054	4.96975	6.28425	7.82213	5.15428	27.235
1.71121	4.32265	8.23899	8.1859	6.17702	5.89329	8.35327	6.99469
2.32693	5.79719	4.11274	8.31357	11.3434	6.74346	6.20791	7.63285
2.13889	9.10504	5.70234	7.4718	6.58695	5.25216	5.22568	5.69948
5.02245	6.9372	5.49171	5.8836	7.2561	4.91099	7.29205	6.88038
1.28381	5.20763	5.64871	7.4263	6.63581	6.50279	7.8059	5.00728
2.58853	5.50018	7.55496	7.74235	6.80044	8.24873	5.55045	6.60723
3.09165	3.48862	5.06113	7.449	7.22655	7.26018	5.6034	9.14588
1.77488	4.9747	4.51817	8.65103	7.82826	5.36687	5.59329	5.41527
6.53352	5.71983	6.40504	4.68269	5.60772	6.70295	7.68149	20.5044
1.87726	4.79646	5.54478	5.80528	4.95891	5.43543	5.26631	6.09517
1.92845	7.03994	6.51317	5.03262	6.39829	4.59265	9.45855	9.57909
2.35803	4.29306	10.8698	4.34488	5.94295	5.15867	5.9547	7.2334
1.23893	5.5027	6.16957	4.99437	7.8925	5.57637	5.95399	8.44608
1.06425	5.65393	6.02789	8.96657	5.08822	9.85254	4.89479	7.50217
1.86616	10.0243	6.62191	8.3312	7.74864	8.98168	5.537	5.7573
2.26073	5.33576	3.86432	6.41177	9.78591	6.17957	5.05919	5.89197
1.55433	4.17613	6.72223	5.03763	6.21928	6.8367	4.60013	7.40142
2.39838	6.88722	7.20448	8.71698	5.97888	8.10665	6.67116	7.9984
2.62746	6.09466	6.60836	6.03265	6.20954	13.4278	6.06205	5.02344
1.74186	3.20857	8.92527	7.25648	5.14277	5.97752	6.04936	6.17543
1.68721	5.43713	13.3753	5.53448	6.89077	6.4371	6.56342	7.5346
1.24426	4.71543	13.4163	14.0757	8.24771	35.4473	5.67596	9.55066
9.09841	6.06787	4.58946	4.83414	15.2316	7.1512	5.23067	5.62151
2.12019	8.46593	7.75623	6.96738	11.6192	4.77492	7.23119	5.32844
0.952266	4.90835	9.10131	47.5535	6.90644	4.97232	7.02222	5.05884
1.28592	4.14309	5.3503	8.46043	7.67532	5.9504	4.89576	5.45592
1.37838	7.35896	5.64737	6.05816	9.91006	9.24653	6.21825	4.42369
1.79093	6.45218	13.1221	7.40213	6.11632	5.72445	5.71301	7.64793
1.57501	5.31687	4.42756	5.53819	5.4944	5.96754	8.35847	5.40572
1.33739	4.51384	4.4848	5.61826	7.43193	6.32555	5.58034	7.16852
3.03428	4.38137	15.6121	6.68838	4.5834	5.30593	10.8606	5.90824
1.6405	6.92174	4.64542	4.50475	6.2908	6.18479	5.42077	5.86023
23.2108	8.82856	9.60456	8.17135	9.02043	15.3682	22.2126	7.70628
2.18803	6.56419	12.0033	5.79656	10.8893	4.74232	10.2344	5.4192
3.81619	6.61861	6.1543	5.1073	4.41306	4.5782	5.54098	12.0603
1.78482	5.51216	4.93016	6.33834	8.45732	5.54344	13.7915	5.57364
2.28619	5.3733	8.18087	5.13621	5.92196	13.5138	5.52498	5.5305
1.43326	5.38277	4.6697	5.74335	10.3723	5.73799	5.30762	4.78512
1.32149	13.8715	14.8403	9.94283	6.06838	6.39496	5.79215	8.96337
3.94257	8.89026	5.15365	5.42302	8.38697	6.60571	11.6516	6.3718
1.58756	6.44655	9.57465	7.16889	5.66483	5.36662	5.37293	5.34729
1.98895	5.92516	9.6278	9.96571	6.74657	7.72831	5.74496	5.59335
2.13218	12.9421	6.47351	4.37352	23.7479	10.6812	6.98999	5.42069
2.22648	8.08868	4.12349	9.58373	5.16822	6.4612	7.32112	5.29179
3.48799	5.46329	5.85065	5.02891	6.99661	4.99824	6.15257	4.68175
1.53616	6.34408	12.6224	11.8948	5.64906	6.34973	7.82985	7.99096
1.60275	8.30729	17.5258	12.1805	6.77721	6.86921	8.82845	9.56558
8.19387	5.74014	8.18812	6.23714	14.1454	6.59688	7.57375	10.7
1.51942	4.89676	6.82522	5.55619	5.31553	9.29522	4.8387	19.1036
0.869329	6.92118	5.71137	12.0053	6.5965	4.79817	6.37637	5.88147
1.07826	13.4113	6.30493	16.3619	11.4474	4.95515	20.4964	7.27366
1.47808	4.51403	9.23867	8.91319	11.3197	9.05879	5.62356	7.7513
2.40333	7.71884	6.68375	4.77047	4.8517	9.83272	5.02006	6.14994
2.38547	5.27044	6.37215	5.86374	6.09371	5.32138	4.78772	9.82765
1.8557	9.32153	5.15862	7.45393	4.88095	9.02361	8.94217	5.67458
1.19702	3.42552	7.21205	10.6493	4.69895	5.5802	7.05812	6.78847
1.77305	7.00484	5.64637	5.41324	4.60301	5.30232	5.38345	8.62557
1.19859	5.81572	8.74688	4.70694	8.55629	9.24438	5.95619	5.85671
9.16154	4.09094	9.24948	6.98588	4.62154	5.13515	4.26999	4.70031
1.44653	6.15737	6.40364	5.0536	7.86101	6.46959	6.04206	5.27081
0.85553	4.70481	5.3861	6.38936	6.11083	6.26081	7.5454	7.76985
1.47213	4.1187	9.55754	4.31184	9.24674	8.71124	5.50668	6.2271
1.16402	7.92627	17.2994	5.84573	6.13146	5.91218	6.22483	6.72786
1.37358	3.57671	6.0497	5.65171	5.76193	4.80546	5.35861	5.09303
2.22104	6.32232	7.19916	8.84579	7.78593	21.5172	4.98041	5.80701
1.19791	4.1014	8.05885	5.95307	4.84057	4.58416	5.30832	9.14078
0.922252	9.49368	5.93861	5.26275	8.80314	5.37678	6.47893	5.15146
3.09056	5.67879	8.21625	5.51724	5.55829	6.53222	6.69888	5.70708
1.15979	9.24356	4.78167	4.96073	9.63251	8.20422	8.74426	5.07018
2.05506	8.14422	4.86214	5.65664	5.06048	6.86119	10.0803	5.57709
1.14296	5.79917	7.62703	5.36489	8.29913	9.06073	6.78824	6.30917
0.86658	6.60048	5.43292	18.4594	5.20139	6.25127	9.55013	10.2911
2.77368	4.29707	5.58079	7.63193	7.90787	6.37538	4.74412	15.541
1.26236	5.61449	6.25406	8.40041	6.5139	10.5067	7.29081	25.5453
1.36038	3.38889	7.37606	5.3019	6.21435	6.24593	5.7155	4.91329
2.5845	5.11492	6.08473	6.70991	5.61287	11.2571	9.24358	5.81084
3.20264	5.62476	6.54809	6.30105	7.8933	6.70097	6.63071	6.59451
3.04474	5.03169	6.79494	5.75043	5.93662	5.45722	4.80306	4.22589
1.66256	4.4205	4.87072	5.86988	4.65448	5.45813	7.73228	7.70258
1.8449	5.70493	5.0111	6.55986	5.2828	7.2053	6.09596	7.36786
2.97541	4.87923	9.1172	5.15668	19.6928	6.60971	7.22037	9.30699
2.76402	6.7623	6.63462	5.93109	5.75761	4.51735	6.01421	5.88514
3.24999	3.32464	10.3795	10.4868	8.43427	6.015	7.54833	6.98351
2.46525	5.48066	5.87286	5.01736	4.02894	5.25668	7.63234	7.41734
4.11336	7.63403	3.92271	5.19135	4.6574	4.64882	5.91379	5.3303
1.16373	12.2955	10.6615	5.16024	8.33171	5.03751	4.94726	5.92447
3.85836	6.75973	5.89554	5.62218	7.10427	6.57486	6.55637	8.03613
0.877189	22.3295	6.145	6.26108	5.3512	10.5438	10.3515	7.36193
2.01978	4.56856	5.03903	8.27357	11.5071	4.81307	6.30554	9.08239
2.33619	4.99242	4.62662	6.18665	5.75886	5.89192	5.51243	6.73894
1.89343	5.37403	6.34645	4.94392	5.90397	4.58172	5.23569	6.33898
3.04592	3.67399	4.74626	11.1351	6.02988	6.67414	7.61535	6.77192
1.77208	4.4807	5.31658	4.29621	5.20431	5.19157	6.24948	6.4303
2.59924	5.93973	5.49028	5.15905	6.93396	6.84293	6.02121	6.48507
1.81219	6.37027	6.51817	7.44789	5.52757	5.80748	6.66686	5.69712
10.3482	4.73474	5.14603	13.5841	6.51499	6.2801	4.75897	12.9784
2.73847	7.48237	15.8703	4.32817	8.11168	6.24932	7.01391	5.50073
1.24832	5.35543	6.14056	5.53433	8.83232	7.05568	6.66141	5.10369
2.26208	4.67	5.5788	6.93043	7.00844	5.35023	8.53119	13.6822
1.08342	8.39484	5.44292	6.74323	5.15916	5.96943	7.94713	7.01369
1.7153	4.78217	8.01309	7.87948	9.21239	4.78773	6.41167	5.61632
1.01117	22.5019	6.88718	6.94953	6.81399	5.38252	5.76977	6.88057
0.9099	5.35	4.81388	6.40413	6.20387	6.31188	5.55172	4.65892
0.804309	7.98452	6.52921	5.66094	7.39626	9.02715	4.8411	4.41329
1.22672	6.34761	5.10734	4.56386	4.46366	5.65918	6.34038	6.79184
1.27839	10.7579	6.54807	4.92897	7.81332	4.67677	7.5084	7.39706
2.45003	6.32918	5.11033	5.80805	6.79849	6.00732	6.06707	5.59925
2.96226	4.62911	8.26448	6.07431	8.01838	4.74224	7.29538	6.71426
2.38135	4.68283	24.0519	5.27562	5.93194	7.34443	4.979	6.38617
1.51112	3.81709	8.42538	5.07249	7.31262	6.96321	7.60571	9.33863
1.5303	6.1744	5.15386	11.1458	7.51594	5.84638	5.47104	7.83548
1.98505	4.27257	5.84385	5.15599	5.16166	6.49685	7.16588	5.31978
1.11764	3.89932	6.89472	6.01717	4.51302	5.02902	4.97806	5.4455
1.84461	5.02854	9.22738	6.25882	6.72405	8.24268	6.72995	5.0512
1.55634	4.12314	13.2963	7.08289	6.06869	6.19999	6.03123	9.62703
1.1031	14.7125	6.40816	9.94323	8.57872	6.86267	4.44762	5.49768
1.61542	6.45439	7.2179	8.78205	8.3046	9.4306	5.96986	5.13258
1.38947	13.0595	5.25718	6.60284	5.46633	17.4225	6.80601	6.1708
1.84118	3.60149	6.09497	5.62258	5.10496	4.79593	8.50901	4.72566
2.5382	18.2206	5.45157	5.75108	10.5095	5.01146	5.8251	5.47154
7.06336	6.73806	8.86587	8.08742	6.226	8.73358	8.45143	7.84591
1.01032	3.24048	5.15272	7.3855	11.1846	8.21302	6.81967	10.3261
1.39877	4.09763	5.69149	6.24208	5.81073	5.6861	7.92001	8.55703
1.26361	7.98812	5.89963	5.2196	6.65601	13.1252	7.10754	8.29367
1.73295	4.41237	9.54256	4.09434	5.74615	4.34393	4.59211	5.30302
1.82389	13.0527	7.63953	6.27236	5.66281	13.5739	18.3158	6.73662
1.27629	3.07792	8.03353	5.68197	6.13564	12.1279	9.01576	4.76123
4.04427	5.93898	14.6955	7.85177	6.56677	7.44505	4.71139	6.35794
1.52007	5.31651	4.47886	7.97741	8.48627	5.83768	5.99728	4.48364
1.51884	4.87605	7.29243	4.90118	5.07354	8.55076	5.04651	7.61166
1.62742	3.7519	5.74967	6.57716	5.44534	8.67785	5.68634	4.92428
2.17672	4.51657	8.47774	6.89017	5.99083	5.38949	5.44765	5.7867
1.75481	5.20328	10.6204	8.51083	8.06098	4.85412	11.8809	8.08662
2.98033	20.1643	8.50782	5.52713	5.19672	7.18515	5.47397	6.49446
5.44889	8.95176	6.40943	7.83597	6.93982	7.38588	8.95593	5.06028
1.70834	6.10231	5.7594	7.94519	4.92629	12.7325	5.18073	18.2934
1.35575	12.4011	5.51692	6.86614	6.29241	6.90353	5.67686	15.1014
7.68701	5.78434	6.66485	5.98863	9.24249	5.02662	11.4097	10.2507
1.33206	5.21434	5.18556	5.61085	6.54212	9.90324	8.36741	4.77227
3.78705	3.76417	6.66354	5.73965	5.17025	5.59076	19.4428	7.04181
2.38628	4.09618	5.20945	4.73735	7.56824	7.33356	13.7431	8.17854
2.15519	8.16226	5.29473	6.04105	6.00984	4.76913	4.62209	4.6712
1.69913	5.50038	5.5286	6.51879	7.29424	4.82625	6.40695	7.3867
1.75516	4.45028	9.30496	7.35241	6.53665	5.88304	5.09364	7.08222
2.70136	3.47799	5.45838	6.48576	4.73899	8.84611	5.96422	11.4082
1.51531	3.56249	5.38903	4.63426	6.77355	8.06236	5.9093	5.86174
1.51873	8.5529	10.712	5.27787	9.26802	4.35353	5.6773	5.53305
5.51632	9.98957	5.09244	8.22588	6.58583	10.911	7.08314	14.1716
1.63378	9.12706	5.26604	6.86909	6.86099	8.66604	6.50999	9.12418
2.10894	23.2425	6.34044	5.90675	19.9857	7.19625	6.24188	5.42568
4.45839	4.00732	8.21868	5.22719	8.78351	7.69615	19.2364	9.31797
1.49732	10.2865	6.96176	6.1984	6.70102	11.7907	5.65462	6.27444
2.09769	4.45605	7.57935	4.82851	10.8873	5.44466	6.81125	8.17258
1.27186	5.37636	5.83595	5.3224	5.34	7.84127	6.00625	6.55914
1.45391	3.87224	6.35074	5.65814	5.61313	4.8525	7.13417	7.39977
1.55796	5.63925	6.30563	5.57413	4.39376	6.55993	6.50152	8.17809
2.4777	6.6445	5.3699	4.70827	6.09735	13.5778	7.22195	6.87821
1.38319	9.33636	5.30249	4.89857	6.29836	14.5581	9.97772	5.26214
2.15875	6.81958	5.82327	7.00611	5.64334	5.16726	7.3806	5.57687
1.48588	4.07765	10.5693	4.77831	5.96276	5.40816	10.135	5.98575
1.62037	4.99975	6.49988	7.59128	7.03643	7.78798	5.81815	5.25296
2.77575	8.08995	5.51302	5.52439	28.523	6.46028	5.34712	8.0077
1.14875	5.94771	7.01692	5.86409	8.76244	86.7153	5.56663	7.56436
0.994691	7.5306	5.80194	6.32377	7.09772	9.54603	5.51496	5.53298
2.96332	4.51654	9.56755	6.03061	5.05644	6.13802	9.6368	7.60864
1.11336	12.5695	5.74635	5.53529	9.1144	5.63413	5.50047	8.69018
1.53077	7.92823	4.80767	6.10294	6.95873	7.26591	15.2632	8.87769
2.15326	5.06087	6.3342	5.5921	10.6089	4.87122	11.0858	4.4676
6.79967	6.26124	9.4225	6.63201	5.8937	5.57676	9.15705	4.5954
1.39338	4.97337	9.38187	6.9862	5.76277	8.55465	6.27341	20.1517
1.98569	5.8103	5.80365	5.37368	7.4153	7.04614	6.76796	8.18427
1.3331	6.76225	7.3174	5.29829	5.69244	6.89648	6.66502	4.22587
1.19096	4.14631	7.01576	8.14067	5.66046	6.07856	3.97373	8.05382
1.56547	4.3498	9.87814	4.46729	4.71548	13.344	11.7331	6.04262
1.27845	4.68572	8.43349	5.95376	6.10943	7.4313	6.84518	6.02422
1.58697	8.93269	8.54057	11.3424	6.27188	7.35707	7.40873	7.44064
1.81662	8.61872	8.14781	11.2892	6.92663	5.14892	4.98434	12.4384
2.24089	4.67857	7.14691	4.94266	5.40038	47.1496	7.44277	6.03028
0.817562	7.03572	8.56222	6.02612	5.67146	6.34981	7.70006	11.5806
2.01691	3.68562	6.52201	7.87189	7.69917	6.7157	6.35651	4.38435
1.78341	6.75603	16.7211	7.95742	5.45069	6.93511	6.72569	5.90608
1.86767	5.92375	6.95731	10.3045	6.87448	4.80597	5.38938	11.6693
1.95553	3.6722	6.34842	31.4836	9.97823	5.94608	6.01653	7.39303
11.8972	3.19465	6.28661	5.59876	6.14606	4.80359	7.00162	11.4712
1.4244	4.30078	11.3689	5.6383	7.26131	7.13169	8.24908	5.92501
1.34243	6.81213	4.85469	6.05627	10.9121	6.09624	8.04653	14.7198
2.28432	7.08381	5.5923	6.97204	5.77025	6.02459	6.53559	6.89425
1.48886	6.21366	6.40575	11.8499	6.204	7.12974	4.63545	6.90174
2.16416	11.6118	5.57578	6.35462	6.6018	6.0769	5.89436	8.53099
0.823687	11.7799	5.19679	6.85593	5.62934	9.48735	5.16934	7.685
0.760668	17.089	5.86339	6.67397	4.99199	8.25707	5.0359	7.30897
0.898105	7.10593	9.71187	5.30582	5.39584	5.83787	7.51213	5.46295
1.21099	4.25561	5.04996	6.66629	5.61373	4.52794	7.845	4.44256
1.78891	4.86276	5.76876	8.84236	8.18098	5.88467	5.32204	6.0726
1.07565	5.37535	7.49598	4.59231	11.4683	5.31885	5.24925	6.46344
100.923	6.39105	9.52758	7.44643	5.91813	5.78795	9.78964	8.17413
1.55486	4.21706	6.969	5.44895	5.58854	4.75921	5.44637	6.10379
1.82053	10.2165	5.62844	9.82678	5.29372	5.39524	8.05771	7.70123
1.55109	4.96372	4.60637	6.4088	5.11531	5.21787	26.3901	4.83421
6.70528	5.76257	8.18553	7.39959	5.73554	6.0756	5.95142	4.4108
0.957021	4.00336	8.2864	9.43587	5.50475	4.81008	4.97519	5.9268
1.55684	8.05866	4.16781	4.93415	7.4067	4.84409	6.44947	5.98368
1.07577	6.25008	15.3285	4.83665	7.39625	14.7787	5.31113	5.96333
1.43232	4.11652	7.96897	5.58584	15.3917	8.85522	12.8942	7.58575
1.45349	5.47121	4.73045	5.33616	7.78066	5.6443	5.11308	5.91536
11.2813	5.54951	6.55018	6.75097	14.4804	12.3204	11.097	12.7322
1.79678	3.77579	5.53145	5.85168	6.50377	10.6792	6.17171	6.95704
1.77046	6.17717	10.3618	5.15732	5.13419	7.59469	7.53574	7.38915
3.49962	4.28335	7.20325	4.897	5.17227	7.79403	7.39388	5.76429
1.8432	3.6201	5.27852	4.77446	11.2	6.15468	11.2994	5.70775
1.38395	4.13939	4.94933	10.7998	5.69911	5.45105	14.5678	7.54872
2.18713	5.64106	8.70111	5.47631	5.4784	11.468	4.74639	5.43561
1.51662	7.26183	8.42918	5.7068	13.0164	7.2526	6.8376	6.76318
1.35748	6.71855	5.92209	5.30452	5.74942	10.396	6.24399	9.79363
1.93105	5.50455	5.73105	5.94241	5.75143	6.40408	13.9709	6.05883
2.98983	3.36388	6.50472	4.02228	4.5882	11.5039	5.38694	6.55424
2.32345	4.38703	6.09681	5.22139	7.51007	5.13561	15.3988	5.9844
1.0924	3.61219	5.12572	6.25252	6.84276	4.71412	9.42904	7.6429
3.84451	6.00207	5.14052	6.29811	7.14432	9.91625	5.43114	6.26179
1.67	12.0093	10.1602	5.46875	7.01446	15.8467	7.61172	7.64985
2.65408	4.61341	8.8002	10.3773	8.22767	6.90461	11.3334	5.1636
1.47163	8.65799	4.98034	5.59512	6.00323	11.4189	13.006	5.83682
1.96496	3.52602	7.36775	5.36241	6.12047	6.21545	6.86302	4.80734
4.53083	5.00451	8.30044	11.5575	5.62916	11.4264	4.94659	9.11608
2.22925	5.93174	5.47454	7.04753	7.37575	8.12397	5.19668	7.25003
1.13807	9.62995	5.81752	6.93175	4.85335	5.89612	5.63525	6.3188
1.08264	6.97729	12.4809	7.34519	9.2191	4.8088	5.87188	13.1232
7.3642	4.78392	5.61652	4.43531	4.78109	5.34999	4.92463	9.52102
1.7247	5.26653	5.64106	5.89994	4.79378	7.30696	4.65458	4.57791
0.971029	5.73213	5.74001	5.10593	5.92905	7.53155	10.6134	5.91428
1.84551	7.85408	19.2776	4.21218	5.12819	6.43996	11.8368	6.86821
0.871581	8.49706	13.5625	6.28887	8.42804	6.51955	12.1043	5.17111
1.90611	5.26615	5.64155	5.01821	5.03988	6.709	15.0441	6.67805
2.02811	13.7175	4.76316	5.36078	5.41343	7.51916	5.9474	4.69861
2.38447	5.07304	4.98163	16.8523	4.78914	8.7418	5.45865	11.1064
2.08564	9.62416	6.96539	6.51647	20.1898	6.16122	7.9601	5.17992
4.50348	3.52324	7.51348	4.80277	6.70642	13.1678	10.2561	4.06504
2.36488	4.87611	9.72187	4.39898	4.71222	9.68501	5.79569	5.80253
1.28686	5.34296	10.1923	6.38278	10.9448	7.82052	5.42397	15.0627
1.25882	4.54099	5.54225	6.07873	4.9138	6.51562	4.70249	5.003
2.00426	3.48337	8.41031	5.31704	5.85404	18.8185	5.40205	4.52917
2.82567	5.7504	6.53175	6.67513	5.02738	7.70395	23.0877	4.70044
2.23785	5.2348	6.84582	5.66589	19.379	7.37543	5.74251	5.35999
1.85713	5.07643	10.0728	7.91607	19.5035	6.22107	6.98936	7.33708
1.72988	6.09128	5.34427	7.78554	9.15971	5.26455	7.07173	9.56789
1.33017	7.07199	9.06333	6.5484	6.14969	7.64776	5.02465	6.23934
2.34152	5.51881	7.61445	39.7314	7.46266	9.07792	4.79115	6.2149
0.901661	5.13226	5.77933	9.30948	8.8096	5.94124	21.0279	5.352
1.48869	7.94567	7.85376	6.91654	5.18591	6.32383	5.1189	5.83133
1.72725	4.33283	7.6361	6.8999	6.77635	5.69783	4.67133	5.80164
1.94222	3.93517	6.33761	5.99676	4.81155	6.4595	7.50109	25.393
1.69738	4.78724	5.52899	9.81429	5.93785	10.9693	4.67195	5.99225
3.68293	6.86627	18.2203	12.4208	6.11016	4.41206	10.8059	4.12299
2.9858	6.20458	3.97963	5.409	5.71921	6.84198	11.6023	8.51365
2.04349	7.02068	10.4532	6.30005	4.92085	4.91989	12.7507	6.5611
1.33262	5.20294	8.62353	6.06684	6.30427	5.06886	7.96797	5.86305
2.04857	6.23489	11.6409	5.61852	6.11962	6.37643	8.31441	4.75454
1.33322	4.80481	5.91355	5.52653	8.50643	7.73938	4.82465	15.6585
1.03189	4.87573	6.10724	5.82707	4.76256	6.92075	7.02923	4.87269
1.51516	10.3988	7.57709	4.86688	5.15512	6.01668	7.0033	5.59013
1.62104	7.89801	6.17294	7.54224	6.39026	5.5303	8.48484	5.23418
1.537	5.20931	4.93859	9.48142	5.44629	6.29734	6.21466	6.43894
2.44943	20.2193	5.70752	4.93861	6.1626	5.30972	5.26112	7.64014
2.87928	5.35316	10.2419	8.56301	4.99145	6.09584	5.58075	8.11606
1.70853	4.0484	7.7424	10.7985	7.76911	4.44743	5.871	6.78564
1.03815	8.29552	7.28522	9.10915	5.47314	6.23621	5.15418	5.17422
2.78861	5.76791	5.10396	7.43405	14.2498	5.96689	6.85736	15.6134
1.24373	6.03334	4.6254	4.29093	12.5065	4.53549	7.63034	6.30935
12.0987	3.95283	4.89621	7.16608	6.68623	8.21594	4.03354	6.96557
1.09005	6.62155	16.5468	6.48252	5.5896	6.2231	9.18691	9.77129
1.94725	4.27513	9.40975	7.13798	9.30716	6.74901	6.24961	5.25809
1.15445	6.30714	6.41935	7.22949	16.2304	4.96554	7.70999	9.54529
0.922249	4.93346	7.13624	6.29632	8.93496	5.15982	8.37082	6.30975
0.523775	4.89042	5.13836	5.92886	9.99692	4.54894	5.10025	7.25067
1.95633	4.67551	8.94643	5.38563	5.99607	10.9297	5.34752	12.9933
1.29054	3.93661	11.767	5.64007	6.0095	7.60388	4.54504	5.61596
0.98069	5.58997	8.22906	5.48656	4.49116	9.68391	8.6714	6.41307
1.98587	7.62577	4.84667	9.78305	4.72116	5.19246	6.60572	5.30676
2.17007	4.23655	5.85908	10.1255	4.83874	5.80874	5.6663	14.8856
1.63881	3.70753	7.21531	7.92961	4.74784	5.98851	5.88223	4.22379
2.20798	13.5887	11.2548	5.58316	8.7525	4.26841	27.2563	5.76723
1.06409	5.89535	6.04466	6.63461	8.15781	5.99892	7.58507	5.82417
1.64837	6.66333	6.1275	7.0911	5.05551	4.11761	7.03633	6.28102
1.88158	13.9122	7.03399	5.33979	7.54087	4.85759	7.77534	5.04113
1.72073	5.11948	15.3584	8.0623	4.79968	5.80116	8.19807	6.51888
3.48071	6.39668	10.0058	5.88674	5.54067	9.57425	5.5454	6.92694
1.25209	5.4984	14.4176	6.05076	6.52655	6.62505	4.81368	5.60674
1.33587	4.96007	4.782	10.2043	5.73545	5.2342	5.8163	5.47438
2.48142	5.46265	7.85043	6.48	6.10309	5.89329	5.50958	4.85503
11.4627	7.08252	5.56057	5.32285	4.90632	4.9332	6.53367	5.9391
1.27457	5.45362	6.6708	16.1623	5.25871	5.08273	8.44265	6.52826
1.26168	7.87634	5.42754	6.11574	5.8745	6.65007	5.11075	5.41962
7.69014	6.81506	5.71797	6.66493	133.202	5.84924	17.6053	13.5339
1.07346	8.45836	8.12561	8.10048	26.4419	5.33322	4.59594	9.78025
0.930169	4.51735	6.02962	6.81281	6.41804	4.38819	6.19774	6.2129
1.70305	8.55516	5.41192	13.4363	8.02629	5.36154	6.04927	6.51963
2.99017	7.38052	7.25341	5.73322	6.25617	4.94308	5.29153	4.97438
1.7487	4.32379	5.86406	4.71215	5.48865	10.6778	6.87481	7.78383
6.97822	3.86805	6.13274	6.42559	7.05188	5.89228	10.6918	4.55951
1.54872	4.54713	8.29366	4.93855	5.18651	4.447	7.13792	5.42321
1.73039	6.18175	10.8099	6.5651	5.66392	8.94902	5.65248	8.06381
1.26786	4.4601	6.85744	7.37749	7.24649	4.66396	6.47768	6.9387
1.95526	6.48147	4.20265	10.5196	8.40929	4.76137	8.02025	5.01703
1.96451	3.06907	7.12779	10.9003	6.26079	5.56236	5.91647	8.73626
1.89644	81.3266	5.68464	6.29877	9.37878	5.69014	6.26946	6.33331
3.27588	3.73305	4.527	16.2284	4.80969	5.83119	5.14109	6.768
1.24848	3.8818	10.5431	6.59044	7.18995	7.08839	6.45048	8.44153
3.22278	4.73983	5.40524	5.85644	5.0415	5.07553	4.289	9.43944
1.86668	5.25226	5.60765	4.6775	5.71509	5.81085	8.52601	6.76738
3.59266	15.8181	11.1186	7.86233	5.52629	5.20773	12.7328	6.30193
1.47304	7.46002	5.24674	6.90119	5.43652	6.68678	7.78194	7.39553
1.62745	6.72804	6.54134	9.8373	6.15554	5.99924	10.1643	9.4038
1.59807	6.90155	4.98905	5.27257	5.76588	10.4537	5.01624	7.97256
1.71796	3.75318	11.4824	5.61491	5.80798	4.99964	5.17589	6.19778
2.62124	11.472	6.70979	4.07214	9.7816	5.82364	4.75146	8.6739
1.55392	5.11162	5.37113	7.31537	6.19151	8.36685	12.7246	7.91358
1.17154	7.10032	7.61567	4.68841	7.15584	6.01696	5.90805	5.96144
2.05006	8.00398	6.41631	5.87046	5.87269	6.87136	8.69318	4.61284
2.20256	6.80831	8.69429	5.73112	7.64748	6.43773	5.23829	9.7627
3.17835	5.07991	5.37038	6.20337	11.2124	5.51609	10.0659	6.48114
1.37251	3.66911	7.22427	6.34394	7.30261	5.16462	14.7706	6.57781
2.21779	4.59208	7.48008	7.79837	4.82552	6.08034	10.9599	6.13579
1.72554	7.56202	5.94391	4.94343	4.64391	10.6369	6.45521	6.58439
0.911464	4.91356	7.80628	6.06921	6.12838	5.7133	6.33037	5.71089
1.13751	4.84415	5.6542	5.06208	6.98826	6.98255	5.22525	7.98014
0.813526	6.9597	8.44988	5.2684	20.0157	8.58709	6.14974	6.70819
2.58754	7.80086	5.72475	7.48943	20.7555	4.6609	5.21157	6.09032
1.73975	4.30722	5.89966	5.17185	6.17533	8.94356	5.33394	16.1793
1.7703	6.05381	4.55731	7.25279	6.48176	5.30377	4.47529	6.35845
1.64509	5.80583	5.3847	4.89842	5.29879	16.8878	12.3218	4.61973
2.19532	7.57626	6.68252	4.3487	6.42615	5.10454	13.095	18.355
1.81592	30.706	9.21874	5.37387	24.9372	7.83324	6.86265	8.8783
1.36172	5.66653	4.47232	5.59973	8.41036	6.49018	4.22788	11.3992
1.58354	4.71335	6.26945	6.18344	8.9015	4.67841	5.86782	6.12737
1.49245	7.75226	6.43759	6.07344	4.70239	8.79533	4.89063	5.1599
4.56921	6.55131	5.39948	4.75124	6.11413	5.47734	7.09002	7.05981
2.14691	5.58667	7.34878	5.99172	9.74829	4.89158	5.93156	4.57655
1.61671	21.5792	5.32816	5.74167	5.00114	6.21151	5.53147	8.09463
1.2318	5.8221	6.95976	6.87528	6.80915	6.20724	5.04262	5.38321
1.92296	15.4676	5.48054	5.36373	6.41965	6.28851	8.20875	5.45961
0.868874	8.66592	4.87191	4.46769	5.6053	5.0889	7.09214	6.94295
1.63367	6.92564	4.17775	5.4983	11.2109	5.41088	5.92659	4.72473
1.16318	4.27507	6.1469	18.1121	6.40555	6.43109	6.31793	8.69048
1.72722	5.21401	7.34532	6.01449	5.65668	6.31448	7.69237	5.54239
2.04552	5.69551	5.24124	7.52662	8.93428	6.30884	6.16564	8.48515
1.75242	5.33851	4.62642	9.95519	5.86247	8.83502	12.5378	6.45525
3.39352	9.28971	6.18464	7.29039	4.51374	4.55421	7.67925	5.75923
1.8716	5.90563	4.94004	5.98723	5.19563	6.6724	4.97667	6.487
1.52433	3.70377	5.09639	6.59548	6.13476	6.8678	8.16323	4.16918
2.27378	5.1822	6.11376	11.3203	5.28096	11.9853	6.89886	5.88767
2.79729	6.38661	5.96228	5.49102	4.90089	7.2648	7.71078	4.97854
0.912279	8.15667	7.38782	11.0075	5.85649	10.0449	6.99593	7.77869
1.60975	8.0084	3.98065	4.8163	8.05055	6.12279	8.2887	5.43754
1.36572	6.29378	4.62233	4.75806	6.27422	7.01937	5.66745	17.1303
1.55822	6.37815	6.51837	6.93411	11.6312	5.8603	6.91707	6.79298
2.9539	8.62401	6.2565	6.73823	7.25414	4.67349	5.31422	5.58154
1.52445	8.0327	18.9034	4.89165	5.14753	5.26547	5.84874	6.1302
1.90276	6.63185	5.89851	6.00155	6.24403	6.62484	6.16031	5.90214
1.788	7.92856	5.44225	5.61043	4.89655	7.20152	6.26122	9.69415
0.766547	6.46625	19.5365	8.00086	5.72222	4.86458	5.00379	6.92818
1.33687	4.10141	6.02848	5.2093	6.7839	6.88391	7.46287	5.44281
1.22053	4.82514	5.45046	5.63208	4.86903	7.45964	14.6135	8.35737
1.26712	3.50194	12.0305	7.52002	6.17679	7.56459	6.2912	8.7787
1.76707	7.43599	5.61678	7.53771	4.62578	6.31366	7.02614	11.2435
1.88141	6.20638	8.11854	6.02835	5.21502	5.73316	4.95177	7.60788
0.996249	4.97595	13.3272	5.76715	5.13748	6.65711	13.9963	7.30878
45.1605	5.22689	7.36271	5.57483	5.87622	8.39542	6.48975	4.97195
1.50631	4.90041	6.13652	5.00704	10.01	6.92674	4.96074	16.3131
1.25238	4.37571	5.13084	10.4354	6.81023	6.792	5.72152	10.8228
1.55219	3.91035	7.05648	9.00547	7.87656	5.40867	9.96176	12.0898
0.916496	5.09991	4.472	8.5472	6.89615	11.6199	9.90192	6.42497
2.03802	4.15579	7.18025	7.11407	5.36775	6.27451	6.32488	6.99081
4.80746	7.68638	7.03869	5.97893	6.92203	4.68387	14.757	4.97863
1.97868	5.33048	9.23538	14.9368	6.15641	5.08231	7.2249	5.28144
3.97446	4.14003	5.71927	11.0459	9.41635	4.93861	5.29426	5.77265
1.30349	10.488	9.73765	8.49336	5.40588	10.0596	10.9523	6.52041
2.28714	7.71034	7.13117	5.01968	6.64419	5.36511	5.02373	6.30999
2.74567	5.81711	4.43923	6.06219	5.23743	7.3143	4.22494	8.32541
1.20732	4.51836	8.8329	8.72626	12.8436	4.57486	5.96539	8.0005
1.16256	5.34421	6.05038	5.14345	7.80668	4.62768	6.97229	11.2508
1.81284	14.9828	5.22105	5.23287	5.28887	8.38057	7.38486	8.41043
1.96036	7.58665	7.08132	5.32796	4.90443	6.58989	5.99464	7.37871
0.930399	3.26201	6.31045	5.01162	4.60177	4.50911	6.49761	6.11194
1.46505	4.62589	5.31809	7.41082	9.74986	4.32149	4.725	11.9271
1.30689	3.83828	8.43872	6.82729	4.64872	5.82388	5.77069	7.74625
2.01046	5.01177	6.01575	5.598	5.28913	5.94052	5.90864	7.9483
2.0945	4.25108	4.54983	5.68058	9.82167	4.65113	5.77834	7.67535
2.91229	4.7056	13.7868	8.51664	6.54844	6.45979	9.87349	4.20928
1.83728	5.54625	6.80005	6.29071	5.99249	7.07379	8.71446	7.57855
1.72231	3.88378	4.78995	4.93893	13.9108	5.82112	8.27021	7.17986
3.37715	3.86098	4.1291	13.6897	9.85437	5.35845	6.99644	5.50666
1.10263	4.34667	8.07603	8.27214	9.75054	12.7077	5.47212	5.05569
1.68438	8.06642	6.26354	7.23316	6.93189	4.86339	6.47762	5.43794
1.94206	3.59236	7.84575	6.01187	8.76097	8.51849	4.89168	9.45853
1.90203	4.67838	6.6492	5.37121	7.27263	5.15052	5.09954	4.86404
2.42279	10.7208	5.54735	5.29476	4.85266	5.80106	10.8866	20.7725
2.66796	6.82022	6.12057	6.47446	5.04099	6.00749	6.76367	5.21183
3.64764	5.40626	11.6269	5.39666	10.0625	7.81514	6.80359	7.25651
2.10755	5.74359	9.27511	19.4421	4.64767	7.25492	8.0449	17.5488
1.08839	17.9393	7.46565	7.63862	6.41662	6.40626	4.74737	5.58873
1.69914	4.31922	6.77045	5.55312	9.86022	10.6529	6.70349	5.62202
14.618	11.6266	6.92946	5.20345	13.3275	10.1584	17.3278	4.61255
2.21451	5.7339	5.9933	4.93806	5.79036	5.8359	7.0073	7.77915
2.27341	8.36521	7.00159	10.8852	7.39285	5.71596	5.87393	6.04706
2.04282	3.80833	4.88387	8.21041	12.0924	6.37724	6.73289	5.02221
2.90942	11.3185	8.3889	6.39958	5.74816	5.32995	5.389	7.08328
1.21072	15.2534	15.9887	6.99572	14.0639	6.20735	6.08521	4.68898
1.91647	5.42152	6.33667	5.13041	4.34514	13.0083	4.81652	6.98531
2.1491	5.27939	8.60951	5.91708	6.37553	6.33917	6.59502	6.44375
1.29313	5.14193	7.5154	5.31585	6.20293	5.45996	21.7462	7.60609
1.48726	9.22843	10.9032	12.8135	6.01022	11.3998	8.46978	8.75749
1.29271	4.36545	6.63488	4.71801	14.5132	5.59416	10.2844	5.58818
1.80265	6.72268	4.71129	6.74175	7.54323	5.56313	6.58871	8.49161
2.46506	5.62795	13.9055	8.84159	5.75133	7.19722	6.05636	5.93652
1.99629	3.98167	4.58257	11.8354	5.18927	5.67734	6.62929	11.6022
2.9417	4.66466	6.43009	5.37948	5.89228	15.5581	5.60136	8.65415
2.86092	5.22	4.18092	5.1555	5.08113	5.28219	9.72643	6.73393
1.53169	6.49329	6.27239	4.81286	5.50757	5.97435	5.58988	6.11808
1.28513	5.02485	17.812	4.89872	10.9841	8.31863	6.54282	7.32965
1.51531	5.5106	6.31887	7.64296	5.94689	6.38631	6.92413	7.16982
1.95879	8.99608	4.40643	10.3245	7.37014	10.8973	6.18821	6.1106
17.5355	4.26549	7.38906	4.94004	4.44339	5.5941	5.22299	4.73409
1.46084	5.39285	6.14991	5.98776	7.55998	6.10069	4.78195	6.53061
0.857523	6.0183	5.53404	5.3173	7.31962	4.87526	5.96868	5.40055
1.8641	7.899	5.67351	12.0195	12.4147	4.50774	5.31016	4.90341
1.45948	3.51976	5.65869	7.96072	7.28058	4.93508	9.0599	6.19547
1.15032	6.5919	6.83406	6.75089	6.0807	5.35567	8.28532	8.15822
2.63688	11.3289	8.79103	9.34753	6.23103	6.01602	4.38441	7.92841
2.02107	6.24078	5.62688	6.44291	7.18069	8.14066	4.68063	4.73874
1.72062	7.27437	5.29346	5.7465	10.2651	12.8684	12.3266	6.82943
1.24976	3.93463	9.55966	8.09723	11.5309	4.45486	6.93744	7.92741
1.20799	8.05167	5.80488	5.092	8.99603	6.38023	14.6898	4.49441
0.912814	6.55474	5.2675	5.5858	5.06741	9.56665	5.75139	5.32324
1.26113	7.43417	5.4853	6.97196	12.2457	7.34823	10.5132	4.91381
3.29987	12.3872	4.48643	4.82591	9.57364	5.26625	5.80688	9.7969
2.8969	6.6972	6.10741	5.27839	6.70169	8.55062	10.4762	10.7334
1.31217	6.32482	6.06584	5.52787	6.42507	4.58181	16.8088	18.2106
1.33666	5.78023	14.2629	4.84868	5.85053	5.0914	6.52849	5.26315
1.65944	8.00578	5.13185	6.89291	6.47869	7.37792	13.254	9.67118
2.05332	20.2074	7.75372	5.67968	7.31915	5.05252	5.25328	5.83245
6.91522	6.28628	4.5661	8.16005	11.8184	9.05995	5.87195	20.1807
1.71388	7.15353	7.96884	8.30556	6.79545	4.63023	7.10037	9.90781
4.03205	11.3296	5.40408	7.07886	5.96841	9.31468	6.12048	7.09789
2.38165	4.49044	8.1815	5.48398	4.91695	8.48117	6.01529	5.71416
1.60223	4.22297	4.93863	6.84089	6.95799	4.97971	5.05202	6.02483
1.32819	77.4709	21.7001	6.13652	6.70217	8.9396	10.6657	8.64025
1.65046	5.78225	4.99554	7.17312	6.42665	4.51029	9.87728	6.35649
1.66256	4.14855	5.68584	8.43986	5.92239	16.7496	5.8577	5.42097
1.24589	6.43183	7.41421	4.84247	4.97895	10.0867	4.70333	6.05956
2.76711	6.41331	28.3207	8.1331	5.07994	5.90261	5.69676	6.77363
2.1071	6.88554	5.372	6.60345	4.28866	12.0673	10.8933	5.51952
1.28381	5.59046	12.3261	12.2264	5.82487	6.73561	11.0253	10.8701
4.73673	6.36603	11.1149	8.63631	5.61323	5.82085	9.11478	7.70536
2.73197	4.93729	4.4897	4.91094	7.20056	5.29911	16.3278	7.70637
1.54631	7.6157	6.61116	6.21602	5.45498	8.29594	8.9936	9.80221
0.878445	9.98809	10.671	9.00792	7.95688	9.06321	6.72895	8.47035
1.61432	4.30324	5.66879	4.47448	5.29417	6.41547	5.04794	8.49833
1.89086	3.49372	4.43493	6.57505	5.05579	6.90252	4.85495	8.74824
1.97732	7.15857	4.47628	5.39473	6.18503	5.80063	6.02487	6.28965
4.04187	5.41791	4.77637	4.94794	9.33862	5.76815	4.74798	6.27709
2.99273	12.8418	8.4457	5.80876	8.28465	5.23809	6.5544	9.23575
1.49727	4.41618	11.2467	11.5851	5.72275	4.34642	22.4937	6.96567
2.21141	8.07689	10.4712	6.90992	5.22949	13.1504	4.43217	7.73651
1.05623	21.7936	5.1886	4.53908	5.42689	7.62607	10.639	5.52432
0.935225	5.66779	5.7843	7.96364	5.92878	5.24221	10.4787	6.11483
0.973136	4.50757	5.86271	6.48592	4.57305	7.00851	10.7072	5.17811
2.75671	8.30374	6.44968	6.42056	4.99814	6.25674	5.71191	6.37374
1.67494	12.2225	9.91829	9.61473	6.17491	7.14045	6.07712	6.09423
1.26346	6.25476	6.52014	5.53172	5.8615	7.56153	11.5383	4.4206
1.22769	5.81332	7.04409	4.60338	8.61568	7.39765	13.5292	5.58795
1.10132	3.64034	4.21474	5.85306	6.39557	8.09101	5.98029	8.0652
1.89924	6.01914	6.42172	4.43932	6.32127	12.0039	5.29506	6.51153
3.37307	4.1791	13.5859	5.38744	8.33691	4.51432	4.77024	6.03173
1.72836	6.85198	6.22211	4.68486	5.86145	6.52452	8.4436	6.95582
2.63287	4.65904	5.60265	5.60478	5.99963	12.2879	6.66491	5.0829
2.55537	5.82306	4.90181	5.2808	12.8416	5.66746	6.52794	9.6438
3.23787	4.44243	6.98203	5.24301	15.2996	6.67992	5.66803	7.88154
0.964795	5.21646	6.70624	5.98179	6.15772	6.13169	6.88017	4.64255
7.22534	4.18342	9.13796	6.57425	11.5837	6.09953	34.8448	4.97475
1.38374	6.03069	5.98979	6.21193	5.51423	13.8367	5.90438	7.45308
2.35652	6.46744	8.32253	5.42058	8.32339	7.34328	8.55127	5.82696
1.99159	3.88396	8.67573	5.02782	6.80647	4.84968	5.47885	5.51612
1.61716	12.1581	7.79681	7.47391	8.49994	7.40523	14.5726	5.47283
1.18631	10.3939	7.76133	6.38046	7.93255	4.20377	4.31263	5.8906
1.56087	5.57816	5.85273	5.91935	4.96494	7.17374	8.90265	6.99572
1.96251	6.29717	5.62065	6.09182	5.36099	7.39226	4.53327	6.76775
6.33707	7.29671	4.52676	6.43724	6.53885	8.27933	6.24291	5.91283
2.90878	36.1659	5.43477	10.715	10.0871	5.84429	8.0947	5.31762
5.45254	4.40618	6.14367	4.79136	6.58336	11.8738	8.88555	6.61287
3.69783	10.4454	4.73279	15.0388	5.68972	7.36607	15.864	7.82312
0.860395	4.50395	6.39056	6.09098	7.35737	4.7808	13.3371	8.3961
1.52469	3.44098	9.2165	4.9684	6.21539	5.23614	5.60647	10.5284
2.61193	4.99878	5.15131	4.758	5.51739	6.4782	6.77038	8.36124
2.43049	3.2504	5.95148	9.04625	7.40086	6.55727	5.12599	4.59208
1.42232	6.20563	5.71319	4.80486	5.35572	5.06247	7.81835	5.18762
1.13368	5.85551	7.56316	15.8166	4.79098	4.7768	8.3982	5.72671
1.54688	50.1148	5.59734	5.89349	7.00326	8.03475	5.09756	5.22407
0.932179	4.93501	5.88671	7.83685	5.27998	8.88555	9.90426	5.70128
1.74867	7.43515	4.58823	5.95372	5.82711	5.46663	5.69665	5.66208
1.48464	32.6026	5.34728	4.69719	6.46274	6.34755	5.99203	6.00674
1.9497	5.76028	5.5317	7.99186	5.89129	5.37249	6.00688	4.37077
3.41074	5.19352	5.69671	7.87135	6.38481	9.31721	12.467	6.93099
2.63856	5.55575	6.58483	6.84044	6.81887	4.55049	5.49889	5.85111
1.55319	5.37155	7.53688	7.13573	11.7598	6.37873	4.99207	6.37713
2.72776	8.1077	5.84748	5.31109	8.27252	4.38095	5.81718	4.84485
1.84631	6.43283	9.22572	4.70266	17.3463	13.425	6.54416	5.18749
1.21012	4.18371	10.7081	4.8214	6.88094	8.18265	5.20629	5.38513
2.3969	5.22999	7.0786	5.24755	7.88074	5.4133	5.65184	15.9395
1.00526	8.39936	10.0628	7.30318	7.52279	4.82366	5.32858	6.72271
1.47273	12.3684	8.23155	5.91395	4.55051	8.57257	8.29627	4.77686
4.39042	7.82024	5.82743	7.06701	6.55583	24.4837	5.31355	4.11352
1.84933	4.03576	4.55585	4.80292	4.94006	5.57852	6.61687	6.47799
2.36498	8.33237	7.22241	7.10703	5.73811	7.93317	5.17795	6.13022
1.40467	5.17237	6.42379	4.8099	6.40127	4.96346	5.40697	5.32652
0.98143	6.89959	4.69644	6.20122	6.59782	5.71124	10.1384	24.5135
1.78857	4.87849	5.90127	5.89584	9.25899	6.1816	5.86083	4.60795
1.1692	7.2531	10.7078	20.4981	5.80028	6.98218	8.97855	8.54398
1.3641	7.68575	6.50304	6.53055	8.01479	4.88527	6.31159	6.62372
2.06551	15.3136	8.4075	4.63042	5.2541	4.64446	4.6402	7.34204
1.54368	4.73161	6.26487	5.30603	8.34624	5.34748	6.44712	9.90877
3.07669	3.66932	7.75527	6.60458	7.49735	5.42997	8.42924	5.99548
1.09735	6.49108	7.83816	5.45861	5.71173	5.39725	6.56276	6.00651
1.06776	6.35066	5.44135	4.65827	7.72672	6.04392	8.91583	6.12673
2.49339	4.20382	4.89967	5.99869	4.81475	7.7533	4.77347	10.3498
1.71442	91.2529	7.41508	4.12908	6.06791	7.96425	9.25561	10.0764
2.21097	6.938	5.8581	10.1414	5.00888	22.3901	5.05809	8.13821
0.802565	9.14204	6.22602	8.03723	5.56993	5.6057	6.28123	4.92432
1.85707	3.87997	7.66877	4.79171	9.22044	5.64025	6.5034	27.3484
3.00542	3.53023	5.25252	8.89175	4.68621	12.2314	9.62086	4.91542
0.878654	5.45633	6.11462	6.08375	7.54806	7.77937	8.74667	6.26022
2.6097	5.00511	5.85783	9.06848	8.85743	7.09942	7.5015	5.25092
1.92206	5.26354	19.7544	5.17722	34.8376	6.55193	4.9885	8.54826
1.96199	7.70222	6.31456	6.14192	6.48563	4.16491	7.20658	6.41215
2.55022	8.3659	7.25384	5.74313	7.24531	5.73872	4.60693	4.8451
34.8482	7.9344	5.46789	23.2964	7.06238	5.74271	5.57677	7.26728
1.9953	7.59859	5.71703	17.1681	18.1369	5.14983	5.91011	5.52792
2.45555	6.8646	6.7635	5.10029	5.62244	8.40113	7.17204	5.08443
1.51393	5.09296	10.679	4.92493	5.52069	10.8132	8.20157	5.01815
1.47659	4.98546	6.56068	10.8304	4.95935	17.0389	7.5038	6.082
1.34847	4.35388	7.84008	5.80298	10.8939	8.33906	4.88457	6.77928
3.35717	8.21103	7.24141	7.09048	7.77857	10.9196	7.58915	7.24062
6.60453	3.02558	7.19765	15.0876	4.96978	5.95371	6.7822	8.56308
1.57366	3.68597	9.49188	4.09004	9.35565	5.1883	4.55767	5.9464
6.15426	4.31763	4.74042	8.82462	10.3243	11.1787	6.28379	8.71394
1.28937	5.38475	7.23493	6.72715	11.0409	5.72727	6.14628	7.83831
1.66246	9.56359	6.34269	6.90449	9.08649	5.59011	20.1561	9.00291
1.23495	5.44602	7.2671	5.22609	5.23178	6.45235	5.51053	6.84583
1.54869	11.2212	8.37579	8.2448	5.46812	12.482	5.20931	7.62746
6.9169	5.05135	6.32796	6.82643	6.36685	11.4456	7.06268	4.3403
0.980048	5.20128	6.65867	7.30186	7.90031	4.73414	9.12666	6.8315
2.48913	11.9917	4.62682	37.9344	6.45751	5.79045	4.70311	4.93513
1.41564	4.38032	4.68905	4.65062	5.42129	6.70621	5.82472	7.558
1.66559	4.65776	17.421	13.2604	4.36895	6.63344	14.6564	8.54224
1.61656	5.1871	5.58459	5.90757	7.24173	6.07925	4.98854	13.9363
1.13859	7.30177	7.55447	8.64349	4.56173	5.60268	6.10771	4.80489
1.32047	6.58313	4.20059	7.00436	7.20827	5.01083	9.97632	11.2891
1.97358	6.04461	9.16655	8.1276	4.53338	7.08941	27.377	5.15415
5.44697	5.40942	16.0253	6.7532	6.94248	8.40475	6.02994	8.37705
1.41683	3.59765	5.92076	8.39434	5.42984	5.91301	3.86685	16.5182
1.17361	5.90932	6.05388	4.71187	7.05317	8.60691	7.43365	5.89924
2.06804	6.00745	4.3564	6.65427	6.14769	7.88655	6.99652	6.86296
1.12412	5.2861	7.47183	8.34044	9.66306	4.22366	6.84552	5.14611
1.42742	3.72719	8.46353	8.9275	6.15031	5.48012	5.23486	7.59103
1.07999	9.42131	5.73677	6.52478	6.17414	5.92972	9.18752	8.17153
4.99665	3.35803	5.2963	4.49841	15.6737	7.71794	6.79201	4.90483
4.05032	4.67881	4.956	21.2794	4.42689	11.5278	4.88898	10.0825
1.17931	3.60635	4.42036	6.53639	6.34259	12.1406	6.98819	4.81016
1.43963	6.78363	34.7331	4.75735	15.2449	6.12415	33.0579	8.77533
1.53125	7.08263	5.89715	6.65549	6.04137	4.73354	6.4112	8.57144
1.73449	4.70206	4.94723	5.8724	6.01147	7.53125	6.84245	4.7769
2.10392	12.1482	5.12799	10.7335	6.71667	7.05138	7.1249	10.5611
4.93478	7.21353	5.32932	9.27791	5.6523	7.37137	5.23927	5.17242
5.8405	4.57216	9.52377	5.14124	10.8975	5.09333	9.72533	7.40308
1.406	4.76352	7.60154	7.02843	9.5257	6.18253	6.65436	7.97629
0.995823	5.64574	12.8644	9.53484	5.43256	8.31727	6.80077	6.44964
1.59339	3.32037	9.87327	4.52417	5.82874	24.655	8.0364	4.13201
1.5157	7.71778	8.78449	6.56847	5.39854	5.71819	6.22186	5.80816
1.63102	7.43982	4.29721	6.46868	11.9247	9.02081	4.95271	5.565
1.17315	5.60045	4.36563	6.17505	5.68458	11.376	4.74229	5.47798
1.77236	4.12641	4.72089	7.73708	4.76473	19.1843	4.0789	6.65593
1.55536	6.71376	5.70103	6.63446	7.29619	7.3313	7.25651	7.12586
1.26431	5.11778	10.2098	5.45784	4.66609	7.0777	13.4438	8.02635
9.63879	7.11781	5.39358	9.71552	6.8682	5.9086	5.96858	7.33531
1.40277	4.65567	6.42171	8.91705	18.0381	5.62573	16.8004	10.2643
0.881919	5.04007	4.98451	5.73348	6.28157	7.00921	9.61678	7.6084
0.883415	3.75204	9.15314	5.74042	5.73896	13.518	8.82294	6.24466
0.991843	9.58123	6.21408	5.61548	12.2737	5.86044	9.42123	5.88401
0.995558	4.17905	8.05015	7.68003	6.41309	6.57921	4.22385	6.77923
1.51949	5.54452	6.62951	5.44403	10.71	6.17492	8.2262	6.02414
1.46969	5.39905	5.32285	5.74535	7.59419	7.77563	7.00232	14.2891
1.69364	9.01347	7.12694	5.84802	9.62774	38.348	7.89761	8.49745
5.36461	3.91311	5.27561	5.37536	4.4949	4.70114	11.2831	8.17909
11.5829	6.02202	7.03793	25.2734	7.04744	6.41629	4.91537	6.06797
1.50062	4.93673	11.432	6.64439	7.42331	8.18848	5.71447	9.92164
1.67102	12.2597	4.26237	8.82374	7.63543	5.044	5.51832	8.48384
1.98865	28.2543	4.86734	6.85176	4.33196	4.84599	7.45627	7.67827
2.55555	26.5578	4.19077	6.78995	9.30365	7.51429	13.1457	4.379
1.61579	8.71863	6.43674	5.29299	9.45575	7.19462	9.66852	8.12282
1.37414	7.40616	5.54377	4.7018	5.89849	6.10018	4.9171	8.78271
0.736623	5.19444	8.80295	5.50005	4.76841	4.86089	7.49164	5.41925
1.63217	5.16344	12.0681	5.07169	7.20481	8.516	5.64254	11.1716
5.1614	4.96549	9.67174	4.86942	5.06803	6.84329	8.61742	6.18913
1.91529	8.52754	7.79067	4.45767	4.97827	6.36129	4.88657	8.52208
2.13784	5.67806	6.17895	4.48614	5.40357	11.8528	8.50497	6.48218
1.90736	7.85659	11.837	11.0698	6.60767	7.12299	5.35737	6.86284
3.00445	5.47403	4.83617	5.96655	7.92724	5.65129	6.70384	7.19676
2.02929	5.32117	8.41024	5.73542	5.5853	5.10778	7.19238	5.19413
3.36765	8.32811	5.06144	5.62052	10.392	5.34286	4.50765	5.00562
11.732	7.22935	5.85425	8.59715	9.36895	5.38424	4.85073	7.02656
1.91655	4.36231	7.26281	6.60991	5.50379	10.2096	4.394	4.49351
3.14276	4.61492	4.04576	5.6063	4.92804	4.73651	8.56789	5.59238
3.21974	10.8081	4.99884	12.243	9.39466	5.33488	5.77698	7.02613
1.08591	6.85519	11.5858	5.68149	22.6986	8.73682	6.92579	6.15626
1.34131	6.20333	6.58072	8.56584	5.69883	5.77832	6.2353	5.85451
2.14426	6.01218	5.43001	5.54936	4.5558	6.05026	4.91831	4.86376
2.40727	4.57247	7.70152	6.17668	5.14036	5.58339	11.8072	7.902
2.57328	3.75795	9.58954	8.24228	4.81547	5.22445	5.89302	5.91119
1.55029	4.7999	7.45656	10.1408	5.54155	5.2575	9.37346	4.3464
2.51644	5.56346	18.3736	7.17511	4.8213	4.97303	4.60308	7.37233
1.95872	4.71678	6.51639	6.9056	4.72595	7.07331	8.97157	5.30467
1.35307	9.99718	7.60986	4.45703	7.89214	9.11625	4.8526	4.78458
1.5751	3.79889	11.0257	5.69937	5.73006	5.60995	5.34765	6.30307
1.56395	3.94182	6.54612	7.51634	7.16843	5.28778	5.39676	7.81244
2.22581	3.20673	6.66779	7.85508	7.59008	7.08463	5.75278	9.34698
0.778549	4.84429	6.91684	4.65546	5.54426	4.74216	5.85698	7.59414
2.33328	9.26914	5.55742	5.81936	6.97294	6.36369	3.99341	7.19345
1.37636	6.87903	5.09129	6.98141	5.70226	6.23536	8.63729	6.35721
1.05513	7.7188	5.90364	5.78537	5.02545	6.39261	7.93954	10.2827
1.66063	8.60393	8.18773	6.48273	5.68329	5.15675	5.57571	9.09726
2.08362	7.28045	31.4523	6.47635	6.9002	9.25438	6.03624	6.94044
1.52484	34.3007	9.94507	7.3521	9.58862	13.9144	6.52521	6.23609
1.21132	6.41659	36.2233	4.01455	11.6919	6.25217	6.35074	5.73135
4.36046	5.06467	6.4341	8.98434	5.21797	10.0828	5.6213	5.64848
1.24163	4.43985	5.2752	5.02236	5.51599	4.72439	5.008	5.32893
1.7011	6.92523	4.8735	5.53021	7.40584	5.92615	8.17094	5.09004
1.37929	6.05072	6.70395	8.7858	11.9555	5.48857	6.07976	13.6459
2.19155	4.2718	5.97383	7.01942	4.99961	5.90008	4.59692	5.21353
0.909795	5.25985	6.89452	7.29958	5.11624	23.3007	4.76108	10.4966
1.8612	4.87046	6.96201	5.54129	7.78636	14.6569	9.59043	7.34649
1.7045	5.24441	4.26523	5.78357	5.47394	5.43239	5.75358	5.88068
1.60887	10.252	5.12974	5.87498	5.8227	6.52482	6.69047	11.91
1.12606	4.06926	5.52185	6.96005	11.1111	9.56498	5.92753	6.41939
2.01149	4.78042	4.20015	6.9533	5.20299	5.31425	5.23329	6.18973
2.11102	7.8136	6.95078	5.04918	7.44707	5.47481	6.35009	9.37042
2.25124	4.92527	14.6716	11.6606	8.60099	8.14559	5.65891	5.86505
3.51536	7.30959	6.59034	7.64347	7.08847	10.7739	8.47329	5.40825
1.4746	5.65773	5.67454	5.75392	20.0383	5.30691	5.37701	5.16373
1.14867	8.42007	6.64919	5.51892	6.10937	4.71601	6.72828	6.24442
1.90386	7.30701	7.70433	6.71629	7.42508	5.56115	6.05413	5.24095
1.3682	3.8209	4.70433	7.14056	5.00209	5.92672	6.32523	16.321
1.58006	9.35548	6.20916	6.5401	6.71486	16.5552	7.45085	5.72039
1.58624	6.60796	8.32471	9.39637	6.54166	5.8126	6.01877	10.0113
1.32578	3.35086	8.77735	6.91449	5.41447	5.31287	7.62444	5.48074
1.6808	10.5738	10.4339	5.2535	5.0489	5.61893	8.77113	8.92627
1.0833	5.92718	8.81755	6.5234	5.89069	6.07381	6.28389	7.18305
1.24449	8.25519	5.32699	5.95245	6.00985	5.41948	5.89713	20.6215
1.25088	5.96605	9.23394	5.02643	5.41507	9.25675	9.20995	7.11978
12.8128	6.00704	4.75682	9.61294	4.44016	10.9725	7.12839	5.13075
1.64321	4.63116	7.14026	6.43602	8.76155	7.37868	6.78326	4.19154
1.32819	4.78998	5.54709	6.0282	9.22117	9.84594	10.361	5.25497
1.45363	5.29944	6.19606	5.33292	5.39175	5.43059	4.91708	6.43877
1.48343	8.50327	6.24215	5.01796	5.15892	6.53382	7.17272	6.34656
0.770787	4.43073	40.1722	8.01685	6.73955	7.19789	6.32527	7.214
0.818026	7.23098	9.82544	9.37661	6.66987	8.20071	7.36328	6.828
1.32811	7.34244	3.88718	8.07042	6.29941	5.06821	6.9301	11.3451
1.72042	5.0277	8.96997	7.07341	22.7907	6.07778	6.60551	5.11039
1.73674	4.72592	6.06736	5.16998	11.8359	8.10151	4.91523	5.47945
3.56126	4.48567	5.81267	5.09651	7.19598	5.83784	8.83482	8.54397
6.3006	5.61782	4.67488	7.88669	7.79175	20.2975	6.46407	7.32091
2.23187	4.14082	8.28745	6.5585	9.88817	5.95856	7.90472	7.08943
0.920166	9.11417	4.84658	23.2911	7.18052	5.25329	7.14975	8.90318
0.938675	4.86175	7.90495	5.3601	6.31699	5.55237	14.9432	8.66255
4.30179	5.72257	49.6733	15.6935	10.8437	5.76136	4.82154	6.16831
1.42389	5.08856	31.7707	5.83526	5.36529	6.43145	4.81072	7.91734
5.22199	7.08097	4.83102	6.12188	5.81135	7.25339	5.29483	7.38317
1.06894	3.82265	7.98029	12.6373	5.79199	9.75715	5.98797	5.60224
1.18705	3.82554	10.133	68.5435	5.9762	4.91054	5.75794	6.42228
2.32699	5.03199	6.27396	6.36898	5.23761	7.18722	5.96653	6.80514
1.94222	6.35232	10.3888	6.73463	7.1366	6.40095	5.30685	8.10867
1.27232	6.9419	9.26194	6.30415	4.82175	6.88579	6.15666	8.55609
2.9817	5.39845	9.47589	7.34876	5.74962	7.53412	6.41282	6.11481
1.75616	3.99475	5.90917	5.34519	12.463	4.42429	4.49053	10.3495
1.52557	7.92475	6.60186	5.25148	6.27617	5.76266	8.10034	5.59188
2.0745	9.83299	4.6007	7.53883	5.28125	4.96123	6.8068	7.05817
1.66156	5.96901	8.19665	7.44574	4.35951	10.1148	12.2839	7.02311
3.41089	5.03457	5.61087	5.91958	5.40306	9.10435	7.504	6.5294
1.44653	4.43304	5.83742	110.482	5.11555	6.85751	15.7863	9.66007
1.1022	5.54093	7.59033	5.19885	5.02959	8.79009	5.95425	5.10764
1.76875	6.78841	11.2166	11.7542	4.5769	5.42959	6.85713	14.0729
1.09031	4.69153	5.12399	8.34974	7.17621	7.08123	6.28514	4.08546
5.19699	4.55559	6.18687	6.20003	6.87267	5.92535	8.22531	12.5468
1.34531	5.14544	6.49993	6.71567	4.93126	5.67916	14.5119	6.25198
1.14346	6.03359	6.85541	5.35787	8.13324	8.23884	5.60439	15.5187
1.29839	11.0229	10.4424	6.47114	5.49551	6.28829	5.87774	4.99273
1.55947	9.20083	4.74148	8.0774	5.00873	7.38459	6.32228	7.42417
2.29315	5.70167	6.02724	5.90958	5.12836	10.8554	5.36515	9.84542
3.33328	13.8738	5.70814	8.15071	4.7034	6.37861	14.4909	12.3842
3.06007	9.88527	6.18702	7.68602	7.07215	4.26009	5.18208	6.827
1.62587	7.37752	7.30075	4.28742	4.65533	11.9313	6.61481	8.2379
1.83373	8.23919	7.57387	6.74878	6.24154	6.14651	6.51973	6.217
1.76888	7.04656	4.08047	5.64638	6.39033	5.58957	4.89584	12.4324
1.66432	6.23653	5.97899	4.88835	7.95939	5.85927	7.70704	6.22382
1.97497	4.67339	5.39539	5.71783	5.79992	6.08339	7.51659	5.77873
0.970147	7.33856	8.52671	6.20054	8.45901	6.48532	6.93796	7.37085
6.69938	4.96639	7.46536	6.15627	6.81903	6.87133	5.01427	4.90503
2.03821	5.12552	6.64632	4.66083	6.00991	13.9452	7.92493	5.8156
[truncated: 18,000 more rows]
